# Supplementary material for: Multimorbidities and Overprescription of Proton Pump Inhibitors in Older Patients
Source: PubMed Central journal article supplement (PMC4633104; doi:10.1371/journal.pone.0141779), 2015-11-04
Supplement: pone.0141779.s001.pdf [file pone.0141779.s001.pdf]

| N  | Sexe | Age | MotifCSG | CSG_1 | CSG_2 | CSG_3 | CSG_4 | CSG_5 |
|----|------|-----|----------|-------|-------|-------|-------|-------|
| 1  | 1    | 83  | 2        | 0     | 1     | 0     | 0     | 0     |
| 2  | 2    | 94  | 1        | 1     | 0     | 0     | 0     | 0     |
| 3  | 2    | 78  | 9        | 0     | 0     | 0     | 0     | 0     |
| 4  | 2    | 90  | 9        | 0     | 0     | 0     | 0     | 0     |
| 5  | 2    | 89  | 1        | 1     | 0     | 0     | 0     | 0     |
| 6  | 2    | 87  | 5        | 0     | 0     | 0     | 0     | 1     |
| 7  | 2    | 84  | 8        | 0     | 0     | 0     | 0     | 0     |
| 8  | 2    | 103 | 2        | 0     | 1     | 0     | 0     | 0     |
| 9  | 2    | 95  | 3        | 0     | 0     | 1     | 0     | 0     |
| 10 | 2    | 88  | 5        | 0     | 0     | 0     | 0     | 1     |
| 11 | 1    | 88  | 5        | 0     | 0     | 0     | 0     | 1     |
| 12 | 1    | 87  | 1        | 1     | 0     | 0     | 0     | 0     |
| 13 | 2    | 82  | 3        | 0     | 0     | 1     | 0     | 0     |
| 14 | 2    | 101 | 5        | 0     | 0     | 0     | 0     | 1     |
| 15 | 1    | 82  | 8        | 0     | 0     | 0     | 0     | 0     |
| 16 | 2    | 89  | 2        | 0     | 1     | 0     | 0     | 0     |
| 17 | 2    | 89  | 1        | 1     | 0     | 0     | 0     | 0     |
| 18 | 2    | 94  | 2        | 0     | 1     | 0     | 0     | 0     |
| 19 | 2    | 80  | 9        | 0     | 0     | 0     | 0     | 0     |
| 20 | 1    | 96  | 2        | 0     | 1     | 0     | 0     | 0     |
| 21 | 1    | 79  | 6        | 0     | 0     | 0     | 0     | 0     |
| 22 | 1    | 89  | 9        | 0     | 0     | 0     | 0     | 0     |
| 23 | 2    | 95  | 7        | 0     | 0     | 0     | 0     | 0     |
| 24 | 2    | 82  | 2        | 0     | 1     | 0     | 0     | 0     |
| 25 | 2    | 93  | 3        | 0     | 0     | 1     | 0     | 0     |
| 26 | 1    | 81  | 2        | 0     | 1     | 0     | 0     | 0     |
| 27 | 2    | 91  | 1        | 1     | 0     | 0     | 0     | 0     |
| 28 | 1    | 90  | 7        | 0     | 0     | 0     | 0     | 0     |
| 29 | 2    | 100 | 2        | 0     | 1     | 0     | 0     | 0     |
| 30 | 1    | 78  | 2        | 0     | 1     | 0     | 0     | 0     |
| 31 | 2    | 89  | 2        | 0     | 1     | 0     | 0     | 0     |
| 32 | 2    | 87  | 9        | 0     | 0     | 0     | 0     | 0     |
| 33 | 2    | 88  | 3        | 0     | 0     | 1     | 0     | 0     |
| 34 | 2    | 88  | 1        | 1     | 0     | 0     | 0     | 0     |
| 35 | 1    | 91  | 2        | 0     | 1     | 0     | 0     | 0     |
| 36 | 2    | 9   | 8        | 0     | 0     | 0     | 0     | 0     |
| 37 | 2    | 92  | 2        | 0     | 1     | 0     | 0     | 0     |
| 38 | 2    | 90  | 7        | 0     | 0     | 0     | 0     | 0     |
| 39 | 1    | 80  | 7        | 0     | 0     | 0     | 0     | 0     |
| 40 | 2    | 80  | 6        | 0     | 0     | 0     | 0     | 0     |
| 41 | 1    | 86  | 1        | 1     | 0     | 0     | 0     | 0     |
| 42 | 2    | 86  | 1        | 1     | 0     | 0     | 0     | 0     |
| 43 | 2    | 77  | 8        | 0     | 0     | 0     | 0     | 0     |
| 44 | 2    | 78  | 1        | 1     | 0     | 0     | 0     | 0     |
| 45 | 2    | 92  | 2        | 0     | 1     | 0     | 0     | 0     |
| 46 | 2    | 97  | 1        | 1     | 0     | 0     | 0     | 0     |
| 47 | 2    | 85  | 1        | 1     | 0     | 0     | 0     | 0     |
| 48 | 2    | 94  | 2        | 0     | 1     | 0     | 0     | 0     |
| 49 | 1    | 91  | 2        | 0     | 1     | 0     | 0     | 0     |
| 50 | 2    | 94  | 2        | 0     | 1     | 0     | 0     | 0     |
| 51 | 2    | 84  | 8        | 0     | 0     | 0     | 0     | 0     |
| 52 | 2    | 82  | 8        | 0     | 0     | 0     | 0     | 0     |
| 53 | 2    | 85  | 8        | 0     | 0     | 0     | 0     | 0     |

|     |   |     |   |   |   |   |   |   |
|-----|---|-----|---|---|---|---|---|---|
| 54  | 2 | 79  | 5 | 0 | 0 | 0 | 0 | 1 |
| 55  | 2 | 92  | 6 | 0 | 0 | 0 | 0 | 0 |
| 56  | 2 | 88  | 8 | 0 | 0 | 0 | 0 | 0 |
| 57  | 2 | 75  | 4 | 0 | 0 | 0 | 1 | 0 |
| 58  | 2 | 90  | 6 | 0 | 0 | 0 | 0 | 0 |
| 59  | 2 | 96  | 2 | 0 | 1 | 0 | 0 | 0 |
| 60  | 2 | 92  | 3 | 0 | 0 | 1 | 0 | 0 |
| 61  | 2 | 86  | 2 | 0 | 1 | 0 | 0 | 0 |
| 62  | 2 | 79  | 7 | 0 | 0 | 0 | 0 | 0 |
| 63  | 2 | 80  | 7 | 0 | 0 | 0 | 0 | 0 |
| 64  | 2 | 83  | 8 | 0 | 0 | 0 | 0 | 0 |
| 65  | 2 | 92  | 8 | 0 | 0 | 0 | 0 | 0 |
| 66  | 1 | 81  | 2 | 0 | 1 | 0 | 0 | 0 |
| 67  | 2 | 85  | 3 | 0 | 0 | 1 | 0 | 0 |
| 68  | 2 | 87  | 2 | 0 | 1 | 0 | 0 | 0 |
| 69  | 2 | 85  | 6 | 0 | 0 | 0 | 0 | 0 |
| 70  | 2 | 83  | 8 | 0 | 0 | 0 | 0 | 0 |
| 71  | 2 | 96  | 6 | 0 | 0 | 0 | 0 | 0 |
| 72  | 2 | 90  | 5 | 0 | 0 | 0 | 0 | 1 |
| 73  | 2 | 87  | 8 | 0 | 0 | 0 | 0 | 0 |
| 74  | 2 | 90  | 8 | 0 | 0 | 0 | 0 | 0 |
| 6   | 1 | 91  | 1 | 1 | 0 | 0 | 0 | 0 |
| 76  | 2 | 87  | 2 | 0 | 1 | 0 | 0 | 0 |
| 77  | 2 | 87  | 5 | 0 | 0 | 0 | 0 | 1 |
| 78  | 1 | 79  | 6 | 0 | 0 | 0 | 0 | 0 |
| 79  | 1 | 83  | 1 | 1 | 0 | 0 | 0 | 0 |
| 80  | 1 | 91  | 9 | 0 | 0 | 0 | 0 | 0 |
| 81  | 2 | 87  | 4 | 0 | 0 | 0 | 1 | 0 |
| 82  | 2 | 88  | 8 | 0 | 0 | 0 | 0 | 0 |
| 83  | 2 | 87  | 1 | 1 | 0 | 0 | 0 | 0 |
| 84  | 2 | 92  | 5 | 0 | 0 | 0 | 0 | 1 |
| 85  | 2 | 92  | 3 | 0 | 0 | 1 | 0 | 0 |
| 87  | 1 | 87  | 1 | 1 | 0 | 0 | 0 | 0 |
| 88  | 2 | 86  | 9 | 0 | 0 | 0 | 0 | 0 |
| 89  | 2 | 75  | 2 | 0 | 1 | 0 | 0 | 0 |
| 90  | 2 | 93  | 3 | 0 | 0 | 1 | 0 | 0 |
| 91  | 2 | 91  | 7 | 0 | 0 | 0 | 0 | 0 |
| 92  | 2 | 86  | 6 | 0 | 0 | 0 | 0 | 0 |
| 93  | 2 | 91  | 1 | 1 | 0 | 0 | 0 | 0 |
| 94  | 2 | 89  | 3 | 0 | 0 | 1 | 0 | 0 |
| 95  | 1 | 92  | 9 | 0 | 0 | 0 | 0 | 0 |
| 96  | 1 | 89  | 3 | 0 | 0 | 1 | 0 | 0 |
| 97  | 2 | 87  | 5 | 0 | 0 | 0 | 0 | 1 |
| 98  | 1 | 105 | 9 | 0 | 0 | 0 | 0 | 0 |
| 99  | 2 | 91  | 9 | 0 | 0 | 0 | 0 | 0 |
| 100 | 2 | 88  | 5 | 0 | 0 | 0 | 0 | 1 |
| 101 | 1 | 92  | 8 | 0 | 0 | 0 | 0 | 0 |
| 102 | 1 | 80  | 1 | 1 | 0 | 0 | 0 | 0 |
| 103 | 2 | 88  | 2 | 0 | 1 | 0 | 0 | 0 |
| 104 | 2 | 85  | 7 | 0 | 0 | 0 | 0 | 0 |
| 105 | 2 | 87  | 8 | 0 | 0 | 0 | 0 | 0 |
| 106 | 2 | 86  | 5 | 0 | 0 | 0 | 0 | 1 |
| 107 | 1 | 87  | 5 | 0 | 0 | 0 | 0 | 1 |
| 108 | 2 | 86  | 2 | 0 | 1 | 0 | 0 | 0 |
| 109 | 1 | 93  | 7 | 0 | 0 | 0 | 0 | 0 |
| 110 | 2 | 92  | 3 | 0 | 0 | 1 | 0 | 0 |

|     |   |     |   |   |   |   |   |   |
|-----|---|-----|---|---|---|---|---|---|
| 111 | 2 | 97  | 1 | 1 | 0 | 0 | 0 | 0 |
| 112 | 1 | 88  | 2 | 0 | 1 | 0 | 0 | 0 |
| 113 | 1 | 90  | 9 | 0 | 0 | 0 | 0 | 0 |
| 114 | 1 | 76  | 8 | 0 | 0 | 0 | 0 | 0 |
| 115 | 1 | 93  | 2 | 0 | 1 | 0 | 0 | 0 |
| 116 | 2 | 82  | 1 | 1 | 0 | 0 | 0 | 0 |
| 117 | 2 | 92  | 8 | 0 | 0 | 0 | 0 | 0 |
| 118 | 1 | 79  | 8 | 0 | 0 | 0 | 0 | 0 |
| 119 | 2 | 92  | 8 | 0 | 0 | 0 | 0 | 0 |
| 120 | 2 | 79  | 9 | 0 | 0 | 0 | 0 | 0 |
| 121 | 2 | 88  | 9 | 0 | 0 | 0 | 0 | 0 |
| 122 | 2 | 87  | 4 | 0 | 0 | 0 | 1 | 0 |
| 123 | 1 | 91  | 8 | 0 | 0 | 0 | 0 | 0 |
| 124 | 1 | 82  | 1 | 1 | 0 | 0 | 0 | 0 |
| 125 | 2 | 93  | 3 | 0 | 0 | 1 | 0 | 0 |
| 126 | 1 | 81  | 2 | 0 | 1 | 0 | 0 | 0 |
| 127 | 1 | 80  | 9 | 0 | 0 | 0 | 0 | 0 |
| 128 | 2 | 80  | 1 | 1 | 0 | 0 | 0 | 0 |
| 129 | 1 | 94  | 2 | 0 | 1 | 0 | 0 | 0 |
| 130 | 2 | 83  | 3 | 0 | 0 | 1 | 0 | 0 |
| 131 | 2 | 85  | 1 | 1 | 0 | 0 | 0 | 0 |
| 132 | 2 | 78  | 8 | 0 | 0 | 0 | 0 | 0 |
| 133 | 1 | 86  | 6 | 0 | 0 | 0 | 0 | 0 |
| 134 | 2 | 80  | 8 | 0 | 0 | 0 | 0 | 0 |
| 135 | 2 | 79  | 3 | 0 | 0 | 1 | 0 | 0 |
| 136 | 2 | 83  | 9 | 0 | 0 | 0 | 0 | 0 |
| 137 | 2 | 95  | 1 | 1 | 0 | 0 | 0 | 0 |
| 138 | 2 | 90  | 8 | 0 | 0 | 0 | 0 | 0 |
| 139 | 2 | 88  | 9 | 0 | 0 | 0 | 0 | 0 |
| 140 | 2 | 90  | 8 | 0 | 0 | 0 | 0 | 0 |
| 141 | 2 | 83  | 8 | 0 | 0 | 0 | 0 | 0 |
| 142 | 2 | 87  | 2 | 0 | 1 | 0 | 0 | 0 |
| 143 | 2 | 93  | 1 | 1 | 0 | 0 | 0 | 0 |
| 144 | 2 | 84  | 3 | 0 | 0 | 1 | 0 | 0 |
| 145 | 2 | 92  | 8 | 0 | 0 | 0 | 0 | 0 |
| 146 | 1 | 92  | 2 | 0 | 1 | 0 | 0 | 0 |
| 147 | 1 | 87  | 8 | 0 | 0 | 0 | 0 | 0 |
| 148 | 1 | 76  | 6 | 0 | 0 | 0 | 0 | 0 |
| 149 | 1 | 74  | 1 | 1 | 0 | 0 | 0 | 0 |
| 150 | 2 | 77  | 7 | 0 | 0 | 0 | 0 | 0 |
| 151 | 1 | 73  | 7 | 0 | 0 | 0 | 0 | 0 |
| 152 | 2 | 81  | 7 | 0 | 0 | 0 | 0 | 0 |
| 153 | 2 | 85  | 1 | 1 | 0 | 0 | 0 | 0 |
| 154 | 2 | 88  | 7 | 0 | 0 | 0 | 0 | 0 |
| 155 | 2 | 92  | 8 | 0 | 0 | 0 | 0 | 0 |
| 156 | 1 | 94  | 7 | 0 | 0 | 0 | 0 | 0 |
| 157 | 1 | 81  | 6 | 0 | 0 | 0 | 0 | 0 |
| 158 | 1 | 85  | 8 | 0 | 0 | 0 | 0 | 0 |
| 159 | 2 | 88  | 9 | 0 | 0 | 0 | 0 | 0 |
| 160 | 1 | 87  | 4 | 0 | 0 | 0 | 1 | 0 |
| 161 | 2 | 88  | 7 | 0 | 0 | 0 | 0 | 0 |
| 162 | 1 | 85  | 7 | 0 | 0 | 0 | 0 | 0 |
| 163 | 2 | 101 | 1 | 1 | 0 | 0 | 0 | 0 |
| 164 | 1 | 81  | 7 | 0 | 0 | 0 | 0 | 0 |
| 165 | 2 | 85  | 5 | 0 | 0 | 0 | 0 | 1 |
| 166 | 1 | 78  | 8 | 0 | 0 | 0 | 0 | 0 |

|     |   |    |   |   |   |   |   |   |
|-----|---|----|---|---|---|---|---|---|
| 167 | 2 | 84 | 7 | 0 | 0 | 0 | 0 | 0 |
| 168 | 2 | 90 | 1 | 1 | 0 | 0 | 0 | 0 |
| 169 | 2 | 81 | 1 | 1 | 0 | 0 | 0 | 0 |
| 170 | 2 | 82 | 1 | 1 | 0 | 0 | 0 | 0 |
| 171 | 2 | 87 | 6 | 0 | 0 | 0 | 0 | 0 |
| 172 | 2 | 78 | 7 | 0 | 0 | 0 | 0 | 0 |
| 173 | 2 | 83 | 7 | 0 | 0 | 0 | 0 | 0 |
| 174 | 2 | 99 | 1 | 1 | 0 | 0 | 0 | 0 |
| 175 | 2 | 92 | 8 | 0 | 0 | 0 | 0 | 0 |
| 176 | 2 | 83 | 8 | 0 | 0 | 0 | 0 | 0 |
| 177 | 2 | 90 | 8 | 0 | 0 | 0 | 0 | 0 |
| 178 | 2 | 96 | 1 | 1 | 0 | 0 | 0 | 0 |
| 179 | 2 | 88 | 8 | 0 | 0 | 0 | 0 | 0 |
| 180 | 1 | 77 | 8 | 0 | 0 | 0 | 0 | 0 |
| 181 | 2 | 89 | 1 | 1 | 0 | 0 | 0 | 0 |
| 182 | 2 | 89 | 8 | 0 | 0 | 0 | 0 | 0 |
| 183 | 1 | 93 | 1 | 1 | 0 | 0 | 0 | 0 |
| 184 | 2 | 90 | 5 | 0 | 0 | 0 | 0 | 1 |
| 185 | 2 | 92 | 1 | 1 | 0 | 0 | 0 | 0 |
| 187 | 2 | 77 | 7 | 0 | 0 | 0 | 0 | 0 |
| 188 | 2 | 82 | 6 | 0 | 0 | 0 | 0 | 0 |
| 189 | 2 | 83 | 3 | 0 | 0 | 1 | 0 | 0 |
| 190 | 2 | 89 |   |   |   |   |   |   |
| 191 | 2 | 86 | 6 | 0 | 0 | 0 | 0 | 0 |
| 192 | 2 | 86 | 9 | 0 | 0 | 0 | 0 | 0 |
| 193 | 1 | 85 | 7 | 0 | 0 | 0 | 0 | 0 |
| 194 | 2 | 92 | 1 | 1 | 0 | 0 | 0 | 0 |
| 195 | 1 | 92 | 8 | 0 | 0 | 0 | 0 | 0 |
| 196 | 2 | 87 | 1 | 1 | 0 | 0 | 0 | 0 |
| 197 | 2 | 97 | 4 | 0 | 0 | 0 | 1 | 0 |
| 198 | 2 | 84 | 8 | 0 | 0 | 0 | 0 | 0 |
| 199 | 1 | 88 | 1 | 1 | 0 | 0 | 0 | 0 |
| 200 | 2 | 88 | 8 | 0 | 0 | 0 | 0 | 0 |
| 201 | 1 | 87 | 4 | 0 | 0 | 0 | 1 | 0 |
| 202 | 1 | 78 | 2 | 0 | 1 | 0 | 0 | 0 |
| 203 | 2 | 88 | 2 | 0 | 1 | 0 | 0 | 0 |
| 204 | 2 | 80 | 7 | 0 | 0 | 0 | 0 | 0 |
| 205 | 2 | 88 | 3 | 0 | 0 | 1 | 0 | 0 |
| 206 | 1 | 90 | 5 | 0 | 0 | 0 | 0 | 1 |
| 207 | 2 | 79 | 5 | 0 | 0 | 0 | 0 | 1 |
| 208 | 2 | 90 | 2 | 0 | 1 | 0 | 0 | 0 |
| 209 | 2 | 81 | 9 | 0 | 0 | 0 | 0 | 0 |
| 210 | 1 | 83 | 7 | 0 | 0 | 0 | 0 | 0 |
| 211 | 2 | 88 | 2 | 0 | 1 | 0 | 0 | 0 |
| 212 | 1 | 88 | 4 | 0 | 0 | 0 | 1 | 0 |
| 213 | 2 | 81 | 6 | 0 | 0 | 0 | 0 | 0 |
| 214 | 2 | 88 | 3 | 0 | 0 | 1 | 0 | 0 |
| 215 | 2 | 83 | 3 | 0 | 0 | 1 | 0 | 0 |
| 216 | 1 | 92 | 8 | 0 | 0 | 0 | 0 | 0 |
| 217 | 2 | 82 | 7 | 0 | 0 | 0 | 0 | 0 |
| 218 | 2 | 84 | 8 | 0 | 0 | 0 | 0 | 0 |
| 219 | 2 | 85 | 7 | 0 | 0 | 0 | 0 | 0 |
| 220 | 1 | 83 | 1 | 1 | 0 | 0 | 0 | 0 |
| 221 | 1 | 84 | 6 | 0 | 0 | 0 | 0 | 0 |
| 222 | 2 | 96 | 9 | 0 | 0 | 0 | 0 | 0 |
| 223 | 2 | 91 | 8 | 0 | 0 | 0 | 0 | 0 |

|     |   |    |   |   |   |   |   |   |
|-----|---|----|---|---|---|---|---|---|
| 224 | 2 | 91 | 3 | 0 | 0 | 1 | 0 | 0 |
| 225 | 1 | 93 | 3 | 0 | 0 | 1 | 0 | 0 |
| 226 | 2 | 85 | 8 | 0 | 0 | 0 | 0 | 0 |
| 227 | 2 | 76 | 8 | 0 | 0 | 0 | 0 | 0 |
| 228 | 1 | 83 | 1 | 1 | 0 | 0 | 0 | 0 |
| 229 | 2 | 94 | 9 | 0 | 0 | 0 | 0 | 0 |
| 230 | 2 | 79 | 7 | 0 | 0 | 0 | 0 | 0 |
| 231 | 2 | 83 | 8 | 0 | 0 | 0 | 0 | 0 |
| 232 | 2 | 77 | 2 | 0 | 1 | 0 | 0 | 0 |
| 233 | 1 | 93 | 9 | 0 | 0 | 0 | 0 | 0 |
| 234 | 2 | 78 | 9 | 0 | 0 | 0 | 0 | 0 |
| 235 | 1 | 81 | 6 | 0 | 0 | 0 | 0 | 0 |
| 236 | 2 | 82 | 8 | 0 | 0 | 0 | 0 | 0 |
| 237 | 2 | 87 | 6 | 0 | 0 | 0 | 0 | 0 |
| 238 | 1 | 81 | 3 | 0 | 0 | 1 | 0 | 0 |
| 239 | 1 | 82 | 2 | 0 | 1 | 0 | 0 | 0 |
| 240 | 2 | 87 | 8 | 0 | 0 | 0 | 0 | 0 |
| 241 | 2 | 98 | 8 | 0 | 0 | 0 | 0 | 0 |
| 242 | 2 | 82 | 8 | 0 | 0 | 0 | 0 | 0 |
| 244 | 1 | 82 | 6 | 0 | 0 | 0 | 0 | 0 |
| 245 | 1 | 87 | 7 | 0 | 0 | 0 | 0 | 0 |
| 246 | 1 | 81 | 7 | 0 | 0 | 0 | 0 | 0 |
| 247 | 2 | 88 | 8 | 0 | 0 | 0 | 0 | 0 |
| 248 | 2 | 93 | 1 | 1 | 0 | 0 | 0 | 0 |
| 249 | 2 | 95 | 8 | 0 | 0 | 0 | 0 | 0 |
| 250 | 2 | 88 | 9 | 0 | 0 | 0 | 0 | 0 |
| 251 | 2 | 88 | 8 | 0 | 0 | 0 | 0 | 0 |
| 252 | 2 | 93 | 1 | 1 | 0 | 0 | 0 | 0 |
| 254 | 1 | 86 | 7 | 0 | 0 | 0 | 0 | 0 |
| 255 | 2 | 82 | 2 | 0 | 1 | 0 | 0 | 0 |
| 256 | 1 | 87 | 1 | 1 | 0 | 0 | 0 | 0 |
| 257 | 1 | 89 | 9 | 0 | 0 | 0 | 0 | 0 |
| 258 | 1 | 85 | 7 | 0 | 0 | 0 | 0 | 0 |
| 259 | 1 | 85 | 3 | 0 | 0 | 1 | 0 | 0 |
| 262 | 1 | 82 | 7 | 0 | 0 | 0 | 0 | 0 |
| 263 | 2 | 98 | 9 | 0 | 0 | 0 | 0 | 0 |
| 264 | 1 | 78 | 7 | 0 | 0 | 0 | 0 | 0 |
| 265 | 2 | 85 | 5 | 0 | 0 | 0 | 0 | 1 |
| 266 | 2 | 80 | 8 | 0 | 0 | 0 | 0 | 0 |
| 267 | 2 | 91 | 7 | 0 | 0 | 0 | 0 | 0 |
| 268 | 2 | 92 | 8 | 0 | 0 | 0 | 0 | 0 |
| 269 | 2 | 86 | 1 | 1 | 0 | 0 | 0 | 0 |
| 270 | 1 | 82 | 9 | 0 | 0 | 0 | 0 | 0 |
| 271 | 2 | 85 | 6 | 0 | 0 | 0 | 0 | 0 |
| 272 | 1 | 90 | 6 | 0 | 0 | 0 | 0 | 0 |
| 273 | 1 | 89 | 9 | 0 | 0 | 0 | 0 | 0 |
| 274 | 1 | 86 | 7 | 0 | 0 | 0 | 0 | 0 |
| 275 | 1 | 76 | 9 | 0 | 0 | 0 | 0 | 0 |
| 276 | 2 | 90 | 6 | 0 | 0 | 0 | 0 | 0 |
| 277 | 2 | 79 | 6 | 0 | 0 | 0 | 0 | 0 |
| 278 | 2 | 92 | 2 | 0 | 1 | 0 | 0 | 0 |
| 279 | 2 | 78 | 1 | 1 | 0 | 0 | 0 | 0 |
| 280 | 2 | 76 | 9 | 0 | 0 | 0 | 0 | 0 |
| 281 | 1 | 88 | 1 | 1 | 0 | 0 | 0 | 0 |
| 282 | 2 | 85 | 6 | 0 | 0 | 0 | 0 | 0 |
| 283 | 1 | 92 | 7 | 0 | 0 | 0 | 0 | 0 |

|     |   |    |   |   |   |   |   |   |
|-----|---|----|---|---|---|---|---|---|
| 284 | 2 | 83 | 2 | 0 | 1 | 0 | 0 | 0 |
| 285 | 2 | 87 | 7 | 0 | 0 | 0 | 0 | 0 |
| 286 | 2 | 82 | 8 | 0 | 0 | 0 | 0 | 0 |

| CSG_6 | CSG_7 | CSG_8 | CSG_9 | CSG_10 | ADL | Poids | Taille |
|-------|-------|-------|-------|--------|-----|-------|--------|
| 0     | 0     | 0     | 0     | 0      | 5,0 | 69,0  | 170,0  |
| 0     | 0     | 0     | 0     | 0      | 4,0 | 56,0  | 157,0  |
| 0     | 0     | 0     | 1     | 0      | 6,0 | 69,0  | 148,0  |
| 0     | 0     | 0     | 1     | 0      | 1,5 | 65,0  | 138,0  |
| 0     | 0     | 0     | 0     | 0      | 0,5 | 74,0  | 160,0  |
| 0     | 0     | 0     | 0     | 0      | 5,5 | 49,0  | 144,0  |
| 0     | 0     | 1     | 0     | 0      | 6,0 | 45,0  | 149,0  |
| 0     | 0     | 0     | 0     | 0      | 1,5 | 51,0  | 143,0  |
| 0     | 0     | 0     | 0     | 0      | 6,0 | 55,0  | 150,0  |
| 0     | 0     | 0     | 0     | 0      | 1,5 | 56,0  |        |
| 0     | 0     | 0     | 0     | 0      | 0,0 | 59,0  | 162,0  |
| 0     | 0     | 0     | 0     | 0      | 6,0 | 58,0  | 162,0  |
| 0     | 0     | 0     | 0     | 0      | 4,5 | 66,0  | 156,0  |
| 0     | 0     | 0     | 0     | 0      | 4,5 | 40,0  | 140,0  |
| 0     | 0     | 1     | 0     | 0      | 5,5 | 89,0  | 170,0  |
| 0     | 0     | 0     | 0     | 0      | 6,0 | 63,0  | 149,0  |
| 0     | 0     | 0     | 0     | 0      | 0,5 |       |        |
| 0     | 0     | 0     | 0     | 0      | 3,0 | 44,0  | 141,0  |
| 0     | 0     | 0     | 1     | 0      | 3,5 | 68,0  | 153,0  |
| 0     | 0     | 0     | 0     | 0      | 4,5 | 53,0  | 160,0  |
| 1     | 0     | 0     | 0     | 0      | 3,0 | 91,0  | 164,0  |
| 0     | 0     | 0     | 1     | 0      | 0,5 | 67,0  | 181,0  |
| 0     | 1     | 0     | 0     | 0      | 2,0 | 46,0  | 165,0  |
| 0     | 0     | 0     | 0     | 0      | 5,0 | 93,0  |        |
| 0     | 0     | 0     | 0     | 0      | 5,0 | 81,0  |        |
| 0     | 0     | 0     | 0     | 0      | 5,0 | 125,0 |        |
| 0     | 0     | 0     | 0     | 0      | 6,0 | 45,0  | 147,0  |
| 0     | 1     | 0     | 0     | 0      | 4,0 | 58,0  | 164,0  |
| 0     | 0     | 0     | 0     | 0      | 3,0 | 56,9  |        |
| 0     | 0     | 0     | 0     | 0      | 2,0 | 66,0  | 174,0  |
| 0     | 0     | 0     | 0     | 0      | 4,0 | 65,0  | 149,0  |
| 0     | 0     | 0     | 1     | 0      | 2,5 | 49,5  | 146,0  |
| 0     | 0     | 0     | 0     | 0      | 5,0 | 69,0  | 151,0  |
| 0     | 0     | 0     | 0     | 0      | 0,5 |       |        |
| 0     | 0     | 0     | 0     | 0      | 5,5 | 84,0  | 172,0  |
| 0     | 0     | 1     | 0     | 0      | 5,0 | 59,0  | 149,0  |
| 0     | 0     | 0     | 0     | 0      | 5,0 | 74,5  | 151,0  |
| 0     | 1     | 0     | 0     | 0      | 0,0 | 72,0  | 147,0  |
| 0     | 1     | 0     | 0     | 0      | 3,5 | 78,0  | 180,0  |
| 1     | 0     | 0     | 0     | 0      | 0,0 | 50,0  |        |
| 0     | 0     | 0     | 0     | 0      | 6,0 | 77,0  |        |
| 0     | 0     | 0     | 0     | 0      | 5,0 | 69,0  |        |
| 0     | 0     | 1     | 0     | 0      | 2,5 | 60,0  |        |
| 0     | 0     | 0     | 0     | 0      | 3,5 | 42,0  | 160,0  |
| 0     | 0     | 0     | 0     | 0      | 2,5 | 67,8  |        |
| 0     | 0     | 0     | 0     | 0      | 3,0 | 70,0  | 137,0  |
| 0     | 0     | 0     | 0     | 0      | 3,0 | 59,0  | 145,0  |
| 0     | 0     | 0     | 0     | 0      | 5,5 | 72,4  | 146,0  |
| 0     | 0     | 0     | 0     | 0      | 2,0 | 55,0  | 168,0  |
| 0     | 0     | 0     | 0     | 0      | 6,0 | 63,2  | 155,0  |
| 0     | 0     | 1     | 0     | 0      | 0,5 | 70,0  |        |
| 0     | 0     | 1     | 0     | 0      | 6,0 | 54,1  |        |
| 0     | 0     | 1     | 0     | 0      | 6,0 | 61,2  | 152,0  |

|   |   |   |   |   |     |       |       |
|---|---|---|---|---|-----|-------|-------|
| 0 | 0 | 0 | 0 | 0 | 6,0 | 59,0  | 160,0 |
| 1 | 0 | 0 | 0 | 0 | 3,5 | 51,0  |       |
| 0 | 0 | 1 | 0 | 0 | 2,0 | 62,0  |       |
| 0 | 0 | 0 | 0 | 0 | 6,0 | 104,0 |       |
| 1 | 0 | 0 | 0 | 0 | 3,5 | 57,7  |       |
| 0 | 0 | 0 | 0 | 0 | 0,5 | 50,0  |       |
| 0 | 0 | 0 | 0 | 0 | 5,5 | 61,3  | 150,0 |
| 0 | 0 | 0 | 0 | 0 | 5,5 | 73,0  | 149,0 |
| 0 | 1 | 0 | 0 | 0 | 3,5 | 42,2  | 148,0 |
| 0 | 1 | 0 | 0 | 0 | 4,5 | 68,0  |       |
| 0 | 0 | 1 | 0 | 0 | 6,0 | 67,0  | 158,0 |
| 0 | 0 | 1 | 0 | 0 | 2,5 | 97,5  |       |
| 0 | 0 | 0 | 0 | 0 | 3,0 | 72,7  | 178,0 |
| 0 | 0 | 0 | 0 | 0 | 6,0 | 50,0  |       |
| 0 | 0 | 0 | 0 | 0 | 3,0 | 60,0  |       |
| 1 | 0 | 0 | 0 | 0 | 1,5 | 53,0  |       |
| 0 | 0 | 1 | 0 | 0 | 5,5 | 59,0  | 152,0 |
| 1 | 0 | 0 | 0 | 0 | 3,0 | 66,6  | 139,0 |
| 0 | 0 | 0 | 0 | 0 | 5,0 | 46,0  | 153,0 |
| 0 | 0 | 1 | 0 | 0 | 4,0 |       |       |
| 0 | 0 | 1 | 0 | 0 | 3,0 | 50,0  | 160,0 |
| 0 | 0 | 0 | 0 | 0 | 3,5 | 66,0  |       |
| 0 | 0 | 0 | 0 | 0 | 1,0 | 57,0  |       |
| 0 | 0 | 0 | 0 | 0 | 6,0 | 57,0  |       |
| 1 | 0 | 0 | 0 | 0 | 3,5 | 77,9  | 164,0 |
| 0 | 0 | 0 | 0 | 0 | 0,5 | 64,0  |       |
| 0 | 0 | 0 | 1 | 0 | 5,0 | 67,0  | 132,0 |
| 0 | 0 | 0 | 0 | 0 | 3,0 | 43,0  |       |
| 0 | 0 | 1 | 0 | 0 | 4,0 |       |       |
| 0 | 0 | 0 | 0 | 0 | 6,0 |       |       |
| 0 | 0 | 0 | 0 | 0 | 3,0 | 72,5  |       |
| 0 | 0 | 0 | 0 | 0 | 4,5 | 45,0  |       |
| 0 | 0 | 0 | 0 | 0 | 3,0 |       |       |
| 0 | 0 | 0 | 1 | 0 | 4,0 | 32,0  |       |
| 0 | 0 | 0 | 0 | 0 | 5,5 | 102,0 |       |
| 0 | 0 | 0 | 0 | 0 | 6,0 |       |       |
| 0 | 1 | 0 | 0 | 0 | 2,0 | 61,2  | 138,0 |
| 1 | 0 | 0 | 0 | 0 | 2,0 | 44,3  | 158,0 |
| 0 | 0 | 0 | 0 | 0 | 2,5 | 47,2  | 151,0 |
| 0 | 0 | 0 | 0 | 0 | 5,0 | 47,3  |       |
| 0 | 0 | 0 | 1 | 0 | 3,5 |       |       |
| 0 | 0 | 0 | 0 | 0 | 1,5 | 71,8  |       |
| 0 | 0 | 0 | 0 | 0 | 1,5 | 53,5  |       |
| 0 | 0 | 0 | 1 | 0 | 1,0 | 52,0  |       |
| 0 | 0 | 0 | 1 | 0 | 3,0 | 62,0  |       |
| 0 | 0 | 0 | 0 | 0 | 6,0 |       |       |
| 0 | 0 | 1 | 0 | 0 |     | 59,4  |       |
| 0 | 0 | 0 | 0 | 0 | 2,0 | 98,0  | 174,0 |
| 0 | 0 | 0 | 0 | 0 | 4,0 | 65,9  | 151,0 |
| 0 | 1 | 0 | 0 | 0 | 2,0 | 34,8  | 149,0 |
| 0 | 0 | 1 | 0 | 0 | 5,5 | 67,6  |       |
| 0 | 0 | 0 | 0 | 0 | 6,0 | 46,6  |       |
| 0 | 0 | 0 | 0 | 0 | 0,0 | 49,0  | 156,0 |
| 0 | 0 | 0 | 0 | 0 | 2,5 | 56,0  | 145,0 |
| 0 | 1 | 0 | 0 | 0 | 3,0 | 120,0 | 176,0 |
| 0 | 0 | 0 | 0 | 0 | 1,5 | 60,9  | 158,0 |



|   |   |   |   |   |     |      |       |
|---|---|---|---|---|-----|------|-------|
| 0 | 0 | 0 | 0 | 0 | 4,0 | 66,0 | 155,0 |
| 0 | 0 | 0 | 0 | 0 |     | 58,8 |       |
| 0 | 0 | 0 | 1 | 0 | 4,0 | 50,9 |       |
| 0 | 0 | 1 | 0 | 0 | 3,5 | 85,0 | 170,0 |
| 0 | 0 | 0 | 0 | 0 | 1,0 |      |       |
| 0 | 0 | 0 | 0 | 0 | 5,0 | 73,1 |       |
| 0 | 0 | 1 | 0 | 0 | 3,5 | 91,5 |       |
| 0 | 0 | 1 | 0 | 0 | 3,0 | 81,0 |       |
| 0 | 0 | 1 | 0 | 0 | 5,5 | 59,0 |       |
| 0 | 0 | 0 | 1 | 0 | 5,5 | 91,0 |       |
| 0 | 0 | 0 | 1 | 0 | 4,0 | 60,0 |       |
| 0 | 0 | 0 | 0 | 0 | 6,0 | 76,3 | 156,0 |
| 0 | 0 | 1 | 0 | 0 | 3,5 | 72,3 | 158,0 |
| 0 | 0 | 0 | 0 | 0 | 1,0 | 66,0 |       |
| 0 | 0 | 0 | 0 | 0 | 5,5 | 47,8 |       |
| 0 | 0 | 0 | 0 | 0 | 5,5 | 71,0 |       |
| 0 | 0 | 0 | 1 | 0 | 5,0 | 60,0 |       |
| 0 | 0 | 0 | 0 | 0 | 2,0 | 57,6 |       |
| 0 | 0 | 0 | 0 | 0 | 1,5 | 63,0 |       |
| 0 | 0 | 0 | 0 | 0 | 5,5 | 56,0 | 155,0 |
| 0 | 0 | 0 | 0 | 0 | 6,0 | 48,0 |       |
| 0 | 0 | 1 | 0 | 0 | 5,5 | 49,0 |       |
| 1 | 0 | 0 | 0 | 0 | 4,5 |      |       |
| 0 | 0 | 1 | 0 | 0 | 6,0 | 65,3 |       |
| 0 | 0 | 0 | 0 | 0 | 4,5 | 39,3 |       |
| 0 | 0 | 0 | 1 | 0 | 4,0 |      |       |
| 0 | 0 | 0 | 0 | 0 | 6,0 | 43,5 |       |
| 0 | 0 | 1 | 0 | 0 | 1,0 |      |       |
| 0 | 0 | 0 | 1 | 0 | 6,0 | 49,6 |       |
| 0 | 0 | 1 | 0 | 0 | 1,0 |      |       |
| 0 | 0 | 1 | 0 | 0 | 5,5 | 65,5 |       |
| 0 | 0 | 0 | 0 | 0 | 5,5 | 70,0 | 155,0 |
| 0 | 0 | 0 | 0 | 0 | 5,5 | 68,5 | 140,0 |
| 0 | 0 | 0 | 0 | 0 | 5,0 | 73,4 |       |
| 0 | 0 | 1 | 0 | 0 | 1,0 |      |       |
| 0 | 0 | 0 | 0 | 0 | 0,5 |      |       |
| 0 | 0 | 1 | 0 | 0 | 4,0 | 81,0 | 172,0 |
| 1 | 0 | 0 | 0 | 0 | 6,0 | 52,0 | 150,0 |
| 0 | 0 | 0 | 0 | 0 | 4,0 | 72,0 |       |
| 0 | 1 | 0 | 0 | 0 | 6,0 | 67,0 | 155,0 |
| 0 | 1 | 0 | 0 | 0 | 5,0 | 84,1 |       |
| 0 | 1 | 0 | 0 | 0 | 6,0 |      |       |
| 0 | 0 | 0 | 0 | 0 | 4,0 | 50,0 | 148,0 |
| 0 | 1 | 0 | 0 | 0 | 0,0 | 46,0 |       |
| 0 | 0 | 1 | 0 | 0 | 3,0 | 63,0 |       |
| 0 | 1 | 0 | 0 | 0 | 3,6 | 60,0 |       |
| 1 | 0 | 0 | 0 | 0 | 6,0 | 63,0 | 171,0 |
| 0 | 0 | 1 | 0 | 0 | 4,5 | 66,0 |       |
| 0 | 0 | 0 | 1 | 0 | 6,0 |      |       |
| 0 | 0 | 0 | 0 | 0 | 1,0 | 81,0 |       |
| 0 | 1 | 0 | 0 | 0 | 5,5 | 56,0 | 160,0 |
| 0 | 1 | 0 | 0 | 0 | 3,0 | 97,0 | 172,0 |
| 0 | 0 | 0 | 0 | 0 | 3,0 | 56,0 | 150,0 |
| 0 | 1 | 0 | 0 | 0 | 5,0 | 75,0 | 152,0 |
| 0 | 0 | 0 | 0 | 0 | 5,0 |      |       |
| 0 | 0 | 1 | 0 | 0 | 4,5 | 75,0 |       |

|   |   |   |   |   |     |      |       |
|---|---|---|---|---|-----|------|-------|
| 0 | 1 | 0 | 0 | 0 | 0,0 | 53,0 |       |
| 0 | 0 | 0 | 0 | 0 | 6,0 |      |       |
| 0 | 0 | 0 | 0 | 0 | 1,0 | 54,0 |       |
| 0 | 0 | 0 | 0 | 0 | 6,0 |      |       |
| 1 | 0 | 0 | 0 | 0 | 6,0 | 41,0 |       |
| 0 | 1 | 0 | 0 | 0 | 2,5 |      |       |
| 0 | 1 | 0 | 0 | 0 | 6,0 | 60,0 |       |
| 0 | 0 | 0 | 0 | 0 | 3,5 | 44,0 |       |
| 0 | 0 | 1 | 0 | 0 | 6,0 |      |       |
| 0 | 0 | 1 | 0 | 0 | 4,5 | 44,0 |       |
| 0 | 0 | 1 | 0 | 0 | 0,5 |      |       |
| 0 | 0 | 0 | 0 | 0 | 6,0 | 51,0 | 150,0 |
| 0 | 0 | 1 | 0 | 0 | 4,5 | 48,0 |       |
| 0 | 0 | 1 | 0 | 0 | 5,0 | 58,0 | 160,0 |
| 0 | 0 | 0 | 0 | 0 | 0,0 | 80,0 |       |
| 0 | 0 | 1 | 0 | 0 | 2,0 | 57,0 | 160,0 |
| 0 | 0 | 0 | 0 | 0 | 5,5 | 66,8 | 164,0 |
| 0 | 0 | 0 | 0 | 0 | 6,0 |      |       |
| 0 | 0 | 0 | 0 | 0 | 4,0 | 67,7 |       |
| 0 | 1 | 0 | 0 | 0 | 6,0 |      |       |
| 1 | 0 | 0 | 0 | 0 | 5,5 | 59,5 | 165,0 |
| 0 | 0 | 0 | 0 | 0 | 6,0 | 67,0 | 152,0 |
|   |   |   |   |   | 0,5 |      |       |
| 1 | 0 | 0 | 0 | 0 | 6,0 | 42,0 |       |
| 0 | 0 | 0 | 1 | 0 | 6,0 |      |       |
| 0 | 1 | 0 | 0 | 0 | 4,5 | 67,0 |       |
| 0 | 0 | 0 | 0 | 0 | 0,0 | 50,5 |       |
| 0 | 0 | 1 | 0 | 0 | 5,5 | 61,4 |       |
| 0 | 0 | 0 | 0 | 0 | 1,0 | 60,3 |       |
| 0 | 0 | 0 | 0 | 0 | 3,5 |      |       |
| 0 | 0 | 1 | 0 | 0 | 6,0 | 43,0 |       |
| 0 | 0 | 0 | 0 | 0 | 0,0 | 57,5 |       |
| 0 | 0 | 1 | 0 | 0 | 5,5 | 43,4 |       |
| 0 | 0 | 0 | 0 | 0 | 0,5 | 81,0 |       |
| 0 | 0 | 0 | 0 | 0 | 2,0 |      |       |
| 0 | 0 | 0 | 0 | 0 | 2,5 | 47,0 |       |
| 0 | 1 | 0 | 0 | 0 | 6,0 | 63,3 |       |
| 0 | 0 | 0 | 0 | 0 | 5,5 | 74,0 | 160,0 |
| 0 | 0 | 0 | 0 | 0 | 4,5 | 60,0 |       |
| 0 | 0 | 0 | 0 | 0 | 6,0 |      |       |
| 0 | 0 | 0 | 0 | 0 | 2,0 |      |       |
| 0 | 0 | 0 | 1 | 0 | 6,0 | 56,0 | 163,0 |
| 0 | 1 | 0 | 0 | 0 | 5,5 | 54,8 | 160,0 |
| 0 | 0 | 0 | 0 | 0 | 2,0 | 54,0 | 155,0 |
| 0 | 0 | 0 | 0 | 0 | 3,5 | 58,0 | 169,0 |
| 1 | 0 | 0 | 0 | 0 | 5,0 | 56,0 | 158,0 |
| 0 | 0 | 0 | 0 | 0 | 5,5 | 43,0 | 146,0 |
| 0 | 0 | 0 | 0 | 0 | 6,0 | 53,0 | 151,0 |
| 0 | 0 | 1 | 0 | 0 | 3,5 | 65,0 | 168,0 |
| 0 | 1 | 0 | 0 | 0 | 5,5 | 42,0 | 162,0 |
| 0 | 0 | 1 | 0 | 0 | 2,5 | 65,0 | 150,0 |
| 0 | 1 | 0 | 0 | 0 | 6,0 | 59,0 | 168,0 |
| 0 | 0 | 0 | 0 | 0 | 4,5 | 95,3 | 170,0 |
| 1 | 0 | 0 | 0 | 0 | 1,5 | 72,1 | 178,0 |
| 0 | 0 | 0 | 1 | 0 | 6,0 | 54,3 |       |
| 0 | 0 | 1 | 0 | 0 | 3,5 | 60,2 | 158,0 |

|   |   |   |   |   |     |       |       |
|---|---|---|---|---|-----|-------|-------|
| 0 | 0 | 0 | 0 | 0 | 6,0 | 45,7  |       |
| 0 | 0 | 0 | 0 | 0 | 3,0 | 55,0  | 175,0 |
| 0 | 0 | 1 | 0 | 0 | 6,0 | 64,2  | 154,0 |
| 0 | 0 | 1 | 0 | 0 | 6,0 | 58,7  | 155,0 |
| 0 | 0 | 0 | 0 | 0 | 5,0 | 63,0  | 162,0 |
| 0 | 0 | 0 | 1 | 0 | 2,5 | 73,0  | 158,0 |
| 0 | 1 | 0 | 0 | 0 | 1,5 | 87,9  | 155,0 |
| 0 | 0 | 1 | 0 | 0 | 4,5 | 71,6  |       |
| 0 | 0 | 0 | 0 | 0 | 6,0 | 66,3  | 165,0 |
| 0 | 0 | 0 | 1 | 0 | 5,0 | 59,6  | 142,0 |
| 0 | 0 | 0 | 1 | 0 | 6,0 |       | 156,0 |
| 1 | 0 | 0 | 0 | 0 | 4,0 | 72,5  |       |
| 0 | 0 | 1 | 0 | 0 | 3,0 | 49,4  |       |
| 1 | 0 | 0 | 0 | 0 | 6,0 | 42,9  |       |
| 0 | 0 | 0 | 0 | 0 | 6,0 | 86,0  | 175,0 |
| 0 | 0 | 0 | 0 | 0 | 1,0 | 89,5  | 180,0 |
| 0 | 0 | 1 | 0 | 0 | 4,5 | 74,0  | 155,0 |
| 0 | 0 | 1 | 0 | 0 | 5,0 | 52,8  | 146,0 |
| 0 | 0 | 1 | 0 | 0 | 6,0 | 57,4  | 155,0 |
| 1 | 0 | 0 | 0 | 0 | 6,0 | 56,5  | 153,0 |
| 0 | 1 | 0 | 0 | 0 | 3,0 | 63,5  |       |
| 0 | 1 | 0 | 0 | 0 | 5,0 |       |       |
| 0 | 0 | 1 | 0 | 0 | 2,5 | 103,0 | 155,0 |
| 0 | 0 | 0 | 0 | 0 | 0,5 | 76,0  |       |
| 0 | 0 | 1 | 0 | 0 | 5,5 | 68,7  | 163,0 |
| 0 | 0 | 0 | 1 | 0 | 6,0 | 54,2  | 160,0 |
| 0 | 0 | 1 | 0 | 0 | 1,5 | 52,8  | 153,0 |
| 0 | 0 | 0 | 0 | 0 | 0,5 | 46,1  |       |
| 0 | 1 | 0 | 0 | 0 | 4,0 | 62,0  | 163,0 |
| 0 | 0 | 0 | 0 | 0 | 6,0 | 45,0  | 157,0 |
| 0 | 0 | 0 | 0 | 0 | 5,5 | 70,0  | 156,0 |
| 0 | 0 | 0 | 1 | 0 | 0,0 | 55,0  |       |
| 0 | 1 | 0 | 0 | 0 | 2,0 | 76,6  | 172,0 |
| 0 | 0 | 0 | 0 | 0 | 6,0 | 72,6  | 160,0 |
| 0 | 1 | 0 | 0 | 0 | 2,0 | 103,0 | 181,0 |
| 0 | 0 | 0 | 1 | 0 | 5,5 | 78,7  |       |
| 0 | 1 | 0 | 0 | 0 | 4,5 | 80,0  | 160,0 |
| 0 | 0 | 0 | 0 | 0 | 5,0 | 62,0  | 170,0 |
| 0 | 0 | 1 | 0 | 0 | 3,5 | 58,0  | 150,0 |
| 0 | 1 | 0 | 0 | 0 | 6,0 | 71,0  | 155,0 |
| 0 | 0 | 1 | 0 | 0 | 6,0 | 50,0  | 156,0 |
| 0 | 0 | 0 | 0 | 0 | 6,0 | 60,9  | 16,0  |
| 0 | 0 | 0 | 1 | 0 | 6,0 | 70,0  | 170,0 |
| 1 | 0 | 0 | 0 | 0 | 2,0 | 96,0  | 158,0 |
| 1 | 0 | 0 | 0 | 0 | 2,5 | 74,0  |       |
| 0 | 0 | 0 | 1 | 0 | 6,0 | 80,0  | 180,0 |
| 0 | 1 | 0 | 0 | 0 | 6,0 | 86,0  | 178,0 |
| 0 | 0 | 0 | 1 | 0 | 6,0 | 80,0  | 165,0 |
| 1 | 0 | 0 | 0 | 0 | 1,0 | 59,8  | 165,0 |
| 1 | 0 | 0 | 0 | 0 | 5,5 | 77,0  | 157,0 |
| 0 | 0 | 0 | 0 | 0 | 2,5 | 62,7  | 165,0 |
| 0 | 0 | 0 | 0 | 0 | 6,0 | 49,0  | 150,0 |
| 0 | 0 | 0 | 1 | 0 | 3,0 | 69,0  | 157,0 |
| 0 | 0 | 0 | 0 | 0 | 2,5 | 52,0  | 166,0 |
| 1 | 0 | 0 | 0 | 0 | 5,5 | 76,0  | 162,0 |
| 0 | 1 | 0 | 0 | 0 | 5,5 | 60,8  |       |

|   |   |   |   |   |     |      |       |
|---|---|---|---|---|-----|------|-------|
| 0 | 0 | 0 | 0 | 0 | 6,0 | 60,0 | 157,0 |
| 0 | 1 | 0 | 0 | 0 | 5,5 | 64,2 | 169,0 |
| 0 | 0 | 1 | 0 | 0 | 6,0 | 39,2 | 150,0 |

| BMI  | Hauteur T-G (cm) | LieuHab | DomSeul | AideDom | TypAideDom |
|------|------------------|---------|---------|---------|------------|
| 23,9 | 54,0             | 1       | 1       | 1       | 1          |
| 22,8 | 48,0             | 2       |         | 1       |            |
| 20,5 | 45,0             | 1       | 1       | 1       | 2          |
| 34,0 | 41,0             | 2       |         | 1       |            |
| 29,0 | 53,0             | 2       |         | 1       |            |
| 23,8 | 44,0             | 1       | 1       | 1       | 1          |
| 20,3 | 46,0             | 1       | 1       | 1       | 1          |
| 25,0 | 45,0             | 1       | 1       | 1       | 1          |
| 24,0 |                  | 1       | 0       | 0       |            |
|      |                  | 2       |         | 1       |            |
| 22,0 | 50,0             | 2       |         | 1       |            |
| 18,7 | 52,0             | 1       | 1       | 1       | 3          |
| 27,0 | 47,0             | 1       | 0       | 1       | 1          |
| 20,0 | 43,0             | 1       | 0       | 1       | 2          |
| 31,0 | 55,0             | 1       | 1       | 1       | 1          |
| 28,0 | 47,0             | 1       | 1       | 1       | 1          |
|      |                  | 2       |         | 1       |            |
| 22,0 | 43,0             | 2       |         | 1       |            |
| 29,0 | 46,0             | 1       | 0       | 0       |            |
| 20,0 |                  | 2       |         |         |            |
| 34,0 | 52,0             | 1       | 0       | 0       |            |
| 20,8 |                  | 2       |         | 1       |            |
| 17,0 |                  | 1       | 0       | 1       | 2          |
|      |                  | 1       | 1       | 1       | 1          |
|      |                  | 1       | 1       | 1       | 1          |
|      |                  | 1       | 0       | 1       | 1          |
| 21,0 |                  | 1       | 1       | 1       | 1          |
| 21,0 | 51,0             | 1       | 0       | 1       | 1          |
|      |                  | 1       | 1       | 1       | 1          |
| 22,0 | 56,0             | 1       | 0       | 1       | 1          |
| 29,0 | 47,0             | 1       | 1       | 1       | 1          |
| 23,0 | 44,0             | 1       | 1       | 1       | 2          |
| 30,0 | 48,0             | 2       |         | 1       |            |
|      | 44,0             | 2       |         | 1       |            |
| 28,0 | 55,0             | 1       | 1       | 0       |            |
| 26,6 | 47,0             | 1       | 1       | 1       | 3          |
| 32,0 | 45,0             | 2       |         | 1       |            |
| 33,0 | 46,0             | 2       |         | 1       |            |
| 24,0 |                  | 1       | 1       | 1       | 1          |
|      |                  | 2       |         | 1       |            |
|      |                  | 1       | 0       | 1       | 1          |
|      |                  | 1       | 1       | 1       | 2          |
|      |                  | 1       | 1       | 1       | 1          |
| 16,7 | 51,0             | 1       | 1       | 1       | 3          |
|      |                  | 2       |         | 1       |            |
| 37,0 | 41,0             | 2       |         | 1       |            |
| 28,0 | 44,0             | 1       | 0       | 1       | 3          |
| 34,0 | 46,0             | 1       | 1       | 1       | 3          |
| 19,5 | 53,0             | 1       | 0       | 1       | 3          |
| 26,0 | 51,0             | 1       | 0       | 1       | 2          |
|      |                  | 1       | 0       | 1       | 2          |
|      |                  | 1       | 1       | 1       | 1          |
| 20,8 | 48,0             | 1       | 1       | 1       | 1          |

|      |      |   |   |   |   |
|------|------|---|---|---|---|
| 24,6 | 51,0 | 1 | 1 | 1 | 2 |
|      |      | 2 |   | 1 |   |
|      |      | 1 | 1 | 1 | 1 |
|      |      | 1 | 1 | 0 |   |
|      |      | 2 |   | 1 |   |
|      |      | 2 |   | 1 |   |
| 25,5 | 50,0 | 1 | 1 | 1 | 1 |
| 32,8 | 46,0 | 2 |   | 1 |   |
| 19,0 | 45,0 | 1 | 1 | 1 | 3 |
|      |      | 1 | 1 | 1 | 1 |
| 28,5 |      | 1 | 0 | 1 | 2 |
|      |      | 1 | 1 | 1 | 1 |
| 23,0 | 58,0 | 1 | 0 | 1 | 2 |
|      |      | 1 | 1 | 1 | 1 |
|      |      | 1 | 1 | 1 | 3 |
|      |      | 1 | 0 | 1 | 1 |
| 26,0 | 48,0 | 1 | 1 | 1 | 3 |
| 34,0 | 42,0 | 1 | 1 | 1 | 1 |
| 19,0 | 49,0 | 1 | 0 | 1 | 1 |
|      |      | 1 | 1 | 1 | 1 |
| 20,0 |      | 1 | 1 | 1 | 1 |
|      |      | 2 |   | 1 |   |
|      |      | 2 |   | 1 |   |
|      |      | 1 | 1 | 0 |   |
| 29,0 | 51,0 | 1 | 0 | 1 | 2 |
|      |      | 1 | 0 | 1 | 2 |
| 26,0 | 50,0 | 1 | 0 | 0 |   |
|      |      | 1 | 1 | 1 | 1 |
|      |      | 1 | 1 | 1 | 1 |
|      |      | 2 |   | 1 |   |
|      |      | 1 | 1 | 1 | 1 |
|      |      | 1 | 1 | 1 | 1 |
|      |      | 2 |   | 1 |   |
|      |      | 2 |   | 1 |   |
|      |      | 1 | 1 | 1 | 1 |
|      |      | 1 | 1 | 1 | 1 |
| 32,0 | 41,0 | 2 |   | 1 |   |
| 17,6 | 51,0 | 1 | 1 | 1 | 3 |
| 21,0 | 48,0 | 1 | 1 | 1 | 1 |
|      |      | 2 |   | 1 |   |
|      |      | 1 | 1 | 1 | 1 |
|      |      | 2 |   | 1 |   |
|      |      | 2 |   | 1 |   |
|      |      | 2 |   | 1 |   |
|      |      | 1 | 0 | 1 | 3 |
|      |      | 1 | 1 | 1 | 1 |
|      |      | 1 | 1 | 1 | 1 |
| 32,0 | 56,0 | 2 |   | 1 |   |
| 29,0 |      | 2 |   | 1 |   |
| 16,0 | 46,0 | 1 | 1 | 1 | 3 |
|      |      | 1 | 1 | 1 | 3 |
|      |      | 1 | 0 | 0 |   |
| 20,2 | 47,0 | 2 |   | 1 |   |
| 26,6 | 44,0 | 1 | 1 | 1 | 3 |
| 38,7 | 57,0 | 1 | 1 | 1 | 1 |
| 24,0 | 52,0 | 2 |   | 1 |   |

|      |      |   |   |   |   |
|------|------|---|---|---|---|
| 27,0 | 51,0 | 2 |   | 1 |   |
|      |      | 1 | 0 | 1 | 1 |
|      |      | 1 | 0 | 1 | 1 |
| 29,0 |      | 1 | 0 | 0 |   |
|      |      | 2 |   | 1 |   |
|      |      | 1 | 0 | 1 | 1 |
|      |      | 1 | 1 | 1 | 1 |
|      |      | 1 | 0 | 1 | 1 |
|      |      | 1 | 1 | 1 | 3 |
|      |      | 1 | 0 | 0 |   |
|      |      | 1 | 1 | 1 | 1 |
| 27,0 | 87,0 | 1 | 0 | 0 |   |
| 29,0 | 48,0 | 1 | 0 | 1 | 1 |
|      |      | 1 | 0 | 1 | 3 |
|      |      | 1 | 1 | 1 | 1 |
|      |      | 1 | 0 | 1 | 3 |
|      |      | 1 | 0 | 1 | 2 |
|      |      | 2 |   | 1 |   |
|      |      | 2 |   | 1 |   |
| 23,0 |      | 1 | 1 | 1 | 1 |
|      |      | 1 | 0 | 0 |   |
|      |      | 1 | 1 | 1 | 1 |
|      |      | 1 | 0 | 1 | 1 |
|      |      | 1 | 1 | 0 |   |
|      |      | 1 | 1 | 1 | 1 |
|      |      | 2 |   | 1 |   |
|      |      | 1 | 1 | 1 | 1 |
|      |      | 1 | 1 | 1 | 1 |
|      |      | 2 |   | 1 |   |
|      |      | 1 | 1 | 1 | 1 |
|      |      | 1 | 1 | 1 | 1 |
| 29,0 |      | 1 | 0 | 1 | 2 |
| 34,0 | 42,5 | 1 | 1 | 1 | 3 |
|      |      | 1 | 1 | 1 | 2 |
|      |      | 1 | 1 | 1 | 1 |
|      |      | 1 | 0 | 1 | 1 |
| 28,0 |      | 1 | 0 | 1 | 1 |
| 23,0 | 45,0 | 1 | 0 | 0 |   |
|      |      | 1 | 1 | 1 | 1 |
| 27,0 |      | 1 | 1 | 1 | 3 |
|      |      | 1 | 1 | 1 | 3 |
|      |      | 1 | 1 | 1 | 1 |
| 23,0 | 42,5 | 1 | 0 | 1 | 3 |
|      |      | 1 | 1 | 1 | 3 |
|      |      | 1 | 1 | 1 | 1 |
|      |      | 1 | 0 | 1 | 1 |
| 22,0 |      | 1 | 1 | 1 | 1 |
|      |      | 1 | 0 | 1 | 3 |
|      |      | 1 | 1 | 1 | 3 |
|      |      | 2 |   | 1 |   |
| 21,9 |      | 1 | 1 | 1 | 1 |
| 32,8 | 55,0 | 1 | 1 | 1 | 3 |
| 24,4 | 48,5 | 2 |   | 1 |   |
| 32,5 | 45,0 | 1 | 0 | 1 | 1 |
|      |      | 1 | 1 | 1 | 2 |
|      |      | 1 | 1 | 0 |   |

|      |      |   |   |   |   |
|------|------|---|---|---|---|
|      |      | 2 |   | 1 |   |
|      |      | 1 | 1 | 1 | 1 |
|      |      | 2 |   | 1 |   |
|      |      | 1 | 1 | 1 | 1 |
|      |      | 1 | 1 | 1 | 1 |
|      |      | 1 | 0 | 1 | 1 |
|      |      | 1 | 0 | 0 |   |
|      |      | 1 | 1 | 1 | 1 |
|      |      | 1 | 1 | 1 | 1 |
|      |      | 1 | 1 | 1 | 1 |
|      |      | 2 |   | 1 |   |
| 23,0 |      | 1 | 1 | 1 | 1 |
|      |      | 1 | 1 | 1 | 2 |
| 22,7 |      | 1 | 1 | 1 | 1 |
|      |      | 2 |   | 1 |   |
| 22,0 |      | 1 | 1 | 0 |   |
| 24,8 | 51,0 | 1 | 0 | 1 | 1 |
|      |      | 1 | 1 | 1 | 1 |
|      |      | 1 | 1 | 1 | 3 |
|      |      | 1 | 0 | 1 | 1 |
| 22,0 |      | 2 |   | 1 |   |
| 29,0 |      | 1 | 1 | 0 |   |
|      |      | 2 |   | 1 |   |
|      |      | 1 | 1 | 1 | 1 |
|      |      | 1 | 1 | 1 | 1 |
|      |      | 1 | 0 | 0 |   |
|      |      | 2 |   | 1 |   |
|      |      | 1 | 0 | 0 |   |
|      |      | 2 |   | 1 |   |
|      |      | 1 | 1 | 1 | 3 |
|      |      | 1 | 0 | 1 | 1 |
|      |      | 1 | 0 | 1 | 1 |
|      |      | 1 | 1 | 1 | 1 |
|      |      | 2 |   | 1 |   |
|      |      | 1 | 0 | 1 | 1 |
|      |      | 1 | 1 | 1 | 1 |
|      |      | 1 | 1 | 1 | 1 |
| 29,1 |      | 1 | 1 | 1 | 1 |
|      |      | 1 | 0 | 1 | 3 |
|      |      | 1 | 0 | 0 |   |
|      |      | 1 | 1 | 1 | 1 |
| 21,1 |      | 2 |   | 1 |   |
| 21,3 |      | 1 | 1 | 1 | 1 |
| 22,5 |      | 1 | 1 | 1 | 3 |
| 20,3 |      | 1 | 0 | 1 | 1 |
| 22,4 |      | 1 | 1 | 1 | 1 |
| 20,0 |      | 1 | 1 | 0 |   |
| 23,0 |      | 1 | 1 | 0 |   |
| 23,0 |      | 1 | 1 | 1 | 3 |
| 16,7 |      | 1 | 1 | 0 |   |
| 28,0 |      | 1 | 1 | 1 | 1 |
| 20,9 |      | 1 | 1 | 1 | 1 |
| 33,0 |      | 1 | 0 | 1 | 3 |
| 22,7 |      | 1 | 1 | 1 | 3 |
|      |      | 1 | 1 | 1 | 1 |
| 24,1 |      | 1 | 1 | 0 |   |



|      |  |   |   |   |   |
|------|--|---|---|---|---|
|      |  | 1 | 0 | 1 | 1 |
| 17,9 |  | 1 | 1 | 1 | 3 |
| 27,0 |  | 1 | 1 | 1 | 3 |
| 24,0 |  | 1 | 0 | 1 | 3 |
| 23,0 |  | 1 | 1 | 1 | 1 |
| 29,2 |  | 1 | 1 | 1 | 1 |
| 36,6 |  | 1 | 0 | 1 | 3 |
|      |  | 1 | 0 | 0 |   |
| 24,4 |  | 1 | 0 | 1 | 2 |
| 29,5 |  | 1 | 0 | 1 | 1 |
|      |  | 1 | 0 | 0 |   |
|      |  | 2 |   | 1 |   |
|      |  | 1 | 0 | 1 | 1 |
|      |  | 2 |   | 1 |   |
| 28,1 |  | 1 | 0 | 1 | 3 |
| 27,8 |  | 2 |   | 1 |   |
| 30,8 |  | 1 | 0 | 1 | 1 |
| 24,9 |  | 1 | 1 | 1 | 1 |
| 23,9 |  | 1 | 1 | 0 |   |
| 24,0 |  | 1 | 1 | 0 |   |
|      |  | 1 | 0 | 0 |   |
|      |  | 1 | 0 | 1 | 2 |
| 43,0 |  | 1 | 1 | 1 | 2 |
|      |  | 2 |   | 1 |   |
| 25,8 |  | 1 | 1 | 1 | 1 |
| 21,2 |  | 1 | 1 | 1 | 1 |
| 22,5 |  | 1 | 1 | 1 | 3 |
|      |  | 1 | 1 | 1 | 3 |
| 23,3 |  | 1 | 0 | 1 | 3 |
| 18,0 |  | 1 | 1 | 1 | 1 |
| 28,7 |  | 1 | 0 | 1 | 2 |
|      |  | 2 |   | 1 |   |
| 25,9 |  | 1 | 0 | 1 | 1 |
| 27,0 |  | 1 | 0 | 0 |   |
| 31,4 |  | 1 | 0 | 1 | 3 |
|      |  | 2 |   | 1 |   |
| 31,3 |  | 1 | 1 | 1 | 3 |
| 21,5 |  | 1 | 1 | 1 | 1 |
| 25,8 |  | 1 | 1 | 1 | 1 |
| 29,6 |  | 1 | 1 | 1 | 1 |
| 20,8 |  | 1 | 1 | 1 | 2 |
| 23,2 |  | 1 | 1 | 1 | 1 |
| 24,0 |  | 1 | 0 | 0 |   |
| 38,5 |  | 1 | 1 | 1 | 3 |
|      |  | 2 |   | 1 |   |
| 24,7 |  | 1 | 1 | 1 | 1 |
| 27,1 |  | 1 | 1 | 1 | 1 |
| 29,4 |  | 1 | 1 | 0 |   |
| 22,0 |  | 2 |   | 1 |   |
| 31,3 |  | 1 | 0 | 1 | 2 |
| 23,0 |  | 1 | 1 | 1 | 1 |
| 21,8 |  | 1 | 0 | 1 | 1 |
| 28,0 |  | 1 | 0 | 1 | 3 |
| 19,0 |  | 1 | 1 | 1 | 1 |
| 29,0 |  | 1 | 1 | 1 | 1 |
|      |  | 1 | 1 | 1 | 1 |

|      |  |   |   |   |   |
|------|--|---|---|---|---|
| 24,3 |  | 1 | 1 | 1 | 2 |
| 22,4 |  | 1 | 1 | 1 | 1 |
| 17,4 |  | 1 | 1 | 1 | 1 |

| NbreTTT | MoiIPP | Mol_1 | Mol_2 | Mol_3 | Mol_4 | Mol_5 | PosoiPP |
|---------|--------|-------|-------|-------|-------|-------|---------|
| 13      | 4      | 0     | 0     | 0     | 1     | 0     | 20      |
| 13      | 3      | 0     | 0     | 1     | 0     | 0     | 20      |
| 8       | 4      | 0     | 0     | 0     | 1     | 0     | 20      |
| 12      | 4      | 0     | 0     | 0     | 1     | 0     | 40      |
| 11      | 3      | 0     | 0     | 1     | 0     | 0     | 20      |
| 11      | 3      | 0     | 0     | 1     | 0     | 0     | 40      |
| 6       | 1      | 1     | 0     | 0     | 0     | 0     | 20      |
| 4       | 4      | 0     | 0     | 0     | 1     | 0     | 40      |
| 11      | 1      | 1     | 0     | 0     | 0     | 0     | 20      |
| 8       | 2      | 0     | 1     | 0     | 0     | 0     | 15      |
| 12      | 2      | 0     | 1     | 0     | 0     | 0     | 30      |
| 6       | 4      | 0     | 0     | 0     | 1     | 0     | 40      |
| 6       | 1      | 1     | 0     | 0     | 0     | 0     | 20      |
| 11      | 1      | 1     | 0     | 0     | 0     | 0     | 20      |
| 4       | 3      | 0     | 0     | 1     | 0     | 0     | 10      |
| 6       | 1      | 1     | 0     | 0     | 0     | 0     | 40      |
| 8       | 4      | 0     | 0     | 0     | 1     | 0     | 20      |
| 10      | 1      | 1     | 0     | 0     | 0     | 0     | 20      |
| 9       | 3      | 0     | 0     | 1     | 0     | 0     | 20      |
| 7       | 5      | 0     | 0     | 0     | 0     | 1     | 10      |
| 12      | 1      | 1     | 0     | 0     | 0     | 0     | 80      |
| 13      | 1      | 1     | 0     | 0     | 0     | 0     | 20      |
| 12      | 4      | 0     | 0     | 0     | 1     | 0     | 20      |
| 8       | 1      | 1     | 0     | 0     | 0     | 0     | 40      |
| 9       | 5      | 0     | 0     | 0     | 0     | 1     | 20      |
| 13      | 2      | 0     | 1     | 0     | 0     | 0     | 30      |
| 7       | 4      | 0     | 0     | 0     | 1     | 0     | 40      |
| 5       | 1      | 1     | 0     | 0     | 0     | 0     | 40      |
| 6       | 1      | 1     | 0     | 0     | 0     | 0     | 20      |
| 11      | 4      | 0     | 0     | 0     | 1     | 0     | 20      |
| 10      | 5      | 0     | 0     | 0     | 0     | 1     | 10      |
| 10      | 1      | 1     | 0     | 0     | 0     | 0     | 20      |
| 8       | 4      | 0     | 0     | 0     | 1     | 0     | 20      |
| 8       | 4      | 0     | 0     | 0     | 1     | 0     | 20      |
| 8       | 3      | 0     | 0     | 1     | 0     | 0     | 20      |
| 8       | 3      | 0     | 0     | 1     | 0     | 0     | 20      |
| 8       | 1      | 1     | 0     | 0     | 0     | 0     | 20      |
| 7       | 3      | 0     | 0     | 1     | 0     | 0     | 20      |
| 5       | 4      | 0     | 0     | 0     | 1     | 0     | 20      |
| 7       | 1      | 1     | 0     | 0     | 0     | 0     | 20      |
| 11      | 4      | 0     | 0     | 0     | 1     | 0     | 20      |
| 12      | 4      | 0     | 0     | 0     | 1     | 0     | 20      |
| 7       | 1      | 1     | 0     | 0     | 0     | 0     | 20      |
| 11      | 4      | 0     | 0     | 0     | 1     | 0     | 20      |
| 6       | 1      | 1     | 0     | 0     | 0     | 0     | 20      |
| 9       | 1      | 1     | 0     | 0     | 0     | 0     | 20      |
| 15      | 3      | 0     | 0     | 1     | 0     | 0     | 20      |
| 13      | 4      | 0     | 0     | 0     | 1     | 0     | 20      |
| 6       | 1      | 1     | 0     | 0     | 0     | 0     | 40      |
| 12      | 3      | 0     | 0     | 1     | 0     | 0     | 20      |
| 9       | 1      | 1     | 0     | 0     | 0     | 0     | 20      |
| 11      | 1      | 1     | 0     | 0     | 0     | 0     | 20      |
| 10      | 5      | 0     | 0     | 0     | 0     | 1     | 20      |

|    |   |   |   |   |   |   |    |
|----|---|---|---|---|---|---|----|
| 7  | 1 | 1 | 0 | 0 | 0 | 0 | 40 |
| 7  | 5 | 0 | 0 | 0 | 0 | 1 | 10 |
| 7  | 1 | 1 | 0 | 0 | 0 | 0 | 20 |
| 7  | 3 | 0 | 0 | 1 | 0 | 0 | 20 |
| 19 | 2 | 0 | 1 | 0 | 0 | 0 | 15 |
| 9  | 1 | 1 | 0 | 0 | 0 | 0 | 20 |
| 3  | 2 | 0 | 1 | 0 | 0 | 0 | 30 |
|    | 1 | 1 | 0 | 0 | 0 | 0 | 40 |
| 11 | 1 | 1 | 0 | 0 | 0 | 0 | 20 |
| 12 | 5 | 0 | 0 | 0 | 0 | 1 | 20 |
| 7  | 1 | 1 | 0 | 0 | 0 | 0 | 20 |
| 8  | 5 | 0 | 0 | 0 | 0 | 1 | 10 |
| 5  | 4 | 0 | 0 | 0 | 1 | 0 | 20 |
| 8  | 4 | 0 | 0 | 0 | 1 | 0 | 40 |
| 4  | 4 | 0 | 0 | 0 | 1 | 0 | 20 |
| 5  | 3 | 0 | 0 | 1 | 0 | 0 | 10 |
| 5  | 3 | 0 | 0 | 1 | 0 | 0 | 20 |
| 9  | 4 | 0 | 0 | 0 | 1 | 0 | 20 |
| 10 | 3 | 0 | 0 | 1 | 0 | 0 | 10 |
| 10 | 3 | 0 | 0 | 1 | 0 | 0 | 20 |
| 6  | 3 | 0 | 0 | 1 | 0 | 0 | 20 |
| 10 | 3 | 0 | 0 | 1 | 0 | 0 | 20 |
| 12 | 1 | 1 | 0 | 0 | 0 | 0 | 40 |
| 6  | 3 | 0 | 0 | 1 | 0 | 0 | 20 |
| 9  | 1 | 1 | 0 | 0 | 0 | 0 | 20 |
| 9  | 4 | 0 | 0 | 0 | 1 | 0 | 20 |
| 9  | 1 | 1 | 0 | 0 | 0 | 0 | 20 |
| 5  | 3 | 0 | 0 | 1 | 0 | 0 | 20 |
| 12 | 1 | 1 | 0 | 0 | 0 | 0 | 20 |
| 11 | 4 | 0 | 0 | 0 | 1 | 0 | 20 |
| 10 | 4 | 0 | 0 | 0 | 1 | 0 | 20 |
| 11 | 4 | 0 | 0 | 0 | 1 | 0 | 40 |
| 10 | 4 | 0 | 0 | 0 | 1 | 0 | 20 |
| 8  | 4 | 0 | 0 | 0 | 1 | 0 | 20 |
| 7  | 3 | 0 | 0 | 1 | 0 | 0 | 20 |
| 11 | 3 | 0 | 0 | 1 | 0 | 0 | 20 |
| 6  | 1 | 1 | 0 | 0 | 0 | 0 | 20 |
| 5  | 2 | 0 | 1 | 0 | 0 | 0 | 30 |
| 10 | 1 | 1 | 0 | 0 | 0 | 0 | 20 |
| 8  | 1 | 1 | 0 | 0 | 0 | 0 | 40 |
| 9  | 4 | 0 | 0 | 0 | 1 | 0 | 40 |
| 7  | 1 | 1 | 0 | 0 | 0 | 0 | 20 |
| 10 | 4 | 0 | 0 | 0 | 1 | 0 | 20 |
| 10 | 2 | 0 | 1 | 0 | 0 | 0 | 30 |
| 11 | 4 | 0 | 0 | 0 | 1 | 0 | 20 |
| 6  | 4 | 0 | 0 | 0 | 1 | 0 | 40 |
| 9  | 1 | 1 | 0 | 0 | 0 | 0 | 20 |
| 10 | 1 | 1 | 0 | 0 | 0 | 0 | 20 |
|    | 1 | 1 | 0 | 0 | 0 | 0 | 40 |
| 10 | 4 | 0 | 0 | 0 | 1 | 0 | 20 |
| 8  | 1 | 1 | 0 | 0 | 0 | 0 | 40 |
| 10 | 5 | 0 | 0 | 0 | 0 | 1 | 10 |
| 3  | 1 | 1 | 0 | 0 | 0 | 0 | 20 |
| 13 | 1 | 1 | 0 | 0 | 0 | 0 | 20 |
| 7  | 4 | 0 | 0 | 0 | 1 | 0 | 20 |
| 8  | 3 | 0 | 0 | 1 | 0 | 0 | 20 |

|    |   |   |   |   |   |   |    |
|----|---|---|---|---|---|---|----|
| 13 | 1 | 1 | 0 | 0 | 0 | 0 | 40 |
| 12 | 4 | 0 | 0 | 0 | 1 | 0 | 40 |
| 9  | 1 | 1 | 0 | 0 | 0 | 0 | 40 |
| 2  | 2 | 0 | 1 | 0 | 0 | 0 | 30 |
| 10 | 1 | 1 | 0 | 0 | 0 | 0 | 20 |
| 17 | 1 | 1 | 0 | 0 | 0 | 0 | 40 |
| 8  | 5 | 0 | 0 | 0 | 0 | 1 | 10 |
| 12 | 1 | 1 | 0 | 0 | 0 | 0 | 40 |
| 8  | 3 | 0 | 0 | 1 | 0 | 0 | 20 |
| 8  | 3 | 0 | 0 | 1 | 0 | 0 | 20 |
| 7  | 1 | 1 | 0 | 0 | 0 | 0 | 20 |
|    | 3 | 0 | 0 | 1 | 0 | 0 | 20 |
| 12 | 1 | 1 | 0 | 0 | 0 | 0 | 40 |
| 8  | 3 | 0 | 0 | 1 | 0 | 0 | 20 |
| 8  | 4 | 0 | 0 | 0 | 1 | 0 | 20 |
| 15 | 4 | 0 | 0 | 0 | 1 | 0 | 20 |
| 11 | 1 | 1 | 0 | 0 | 0 | 0 | 40 |
| 9  | 1 | 1 | 0 | 0 | 0 | 0 | 20 |
| 6  | 4 | 0 | 0 | 0 | 1 | 0 | 20 |
| 10 | 1 | 1 | 0 | 0 | 0 | 0 | 20 |
| 10 | 1 | 1 | 0 | 0 | 0 | 0 | 20 |
| 9  | 5 | 0 | 0 | 0 | 0 | 1 | 20 |
| 8  | 1 | 1 | 0 | 0 | 0 | 0 | 20 |
| 8  | 1 | 1 | 0 | 0 | 0 | 0 | 40 |
| 4  | 1 | 1 | 0 | 0 | 0 | 0 | 20 |
| 11 | 5 | 0 | 0 | 0 | 0 | 1 | 10 |
| 5  | 2 | 0 | 1 | 0 | 0 | 0 | 15 |
| 10 | 1 | 1 | 0 | 0 | 0 | 0 | 20 |
| 11 | 3 | 0 | 0 | 1 | 0 | 0 | 20 |
| 4  | 3 | 0 | 0 | 1 | 0 | 0 | 20 |
| 5  | 3 | 0 | 0 | 1 | 0 | 0 | 20 |
| 9  | 4 | 0 | 0 | 0 | 1 | 0 | 40 |
| 8  | 4 | 0 | 0 | 0 | 1 | 0 | 20 |
| 6  | 4 | 0 | 0 | 0 | 1 | 0 | 20 |
| 9  | 1 | 1 | 0 | 0 | 0 | 0 | 40 |
| 7  | 3 | 0 | 0 | 1 | 0 | 0 | 20 |
| 13 | 3 | 0 | 0 | 1 | 0 | 0 | 40 |
| 4  | 1 | 1 | 0 | 0 | 0 | 0 | 20 |
| 10 | 1 | 1 | 0 | 0 | 0 | 0 | 20 |
| 9  | 1 | 1 | 0 | 0 | 0 | 0 | 20 |
| 8  | 1 | 1 | 0 | 0 | 0 | 0 | 20 |
| 9  | 3 | 0 | 0 | 1 | 0 | 0 | 10 |
| 7  | 3 | 0 | 0 | 1 | 0 | 0 | 20 |
| 6  | 1 | 1 | 0 | 0 | 0 | 0 | 20 |
| 9  | 1 | 1 | 0 | 0 | 0 | 0 | 20 |
| 6  | 4 | 0 | 0 | 0 | 1 | 0 | 20 |
| 5  | 4 | 0 | 0 | 0 | 1 | 0 | 40 |
| 5  | 1 | 1 | 0 | 0 | 0 | 0 | 40 |
| 7  | 4 | 0 | 0 | 0 | 1 | 0 | 20 |
| 8  | 1 | 1 | 0 | 0 | 0 | 0 | 20 |
| 7  | 3 | 0 | 0 | 1 | 0 | 0 | 20 |
| 5  | 4 | 0 | 0 | 0 | 1 | 0 | 20 |
| 11 | 4 | 0 | 0 | 0 | 1 | 0 | 20 |
| 7  | 4 | 0 | 0 | 0 | 1 | 0 | 20 |
| 6  | 4 | 0 | 0 | 0 | 1 | 0 | 40 |
| 14 | 1 | 1 | 0 | 0 | 0 | 0 | 20 |

|    |   |   |   |   |   |   |    |
|----|---|---|---|---|---|---|----|
| 13 | 1 | 1 | 0 | 0 | 0 | 0 | 40 |
| 5  | 1 | 1 | 0 | 0 | 0 | 0 | 20 |
| 8  | 1 | 1 | 0 | 0 | 0 | 0 | 20 |
| 8  | 4 | 0 | 0 | 0 | 1 | 0 | 20 |
| 8  | 4 | 0 | 0 | 0 | 1 | 0 | 40 |
| 7  | 4 | 0 | 0 | 0 | 1 | 0 | 20 |
| 12 | 4 | 0 | 0 | 0 | 1 | 0 | 20 |
| 4  | 1 | 1 | 0 | 0 | 0 | 0 | 20 |
| 7  | 1 | 1 | 0 | 0 | 0 | 0 | 20 |
| 9  | 4 | 0 | 0 | 0 | 1 | 0 | 20 |
| 10 | 4 | 0 | 0 | 0 | 1 | 0 | 20 |
| 8  | 2 | 0 | 1 | 0 | 0 | 0 | 30 |
| 5  | 1 | 1 | 0 | 0 | 0 | 0 | 20 |
|    | 1 | 1 | 0 | 0 | 0 | 0 | 20 |
|    | 1 | 1 | 0 | 0 | 0 | 0 | 20 |
| 4  | 1 | 1 | 0 | 0 | 0 | 0 | 20 |
|    | 1 | 1 | 0 | 0 | 0 | 0 | 20 |
| 12 | 1 | 1 | 0 | 0 | 0 | 0 | 40 |
| 9  | 5 | 0 | 0 | 0 | 0 | 1 | 10 |
| 11 | 1 | 1 | 0 | 0 | 0 | 0 | 20 |
| 4  | 3 | 0 | 0 | 1 | 0 | 0 | 20 |
| 12 | 2 | 0 | 1 | 0 | 0 | 0 | 30 |
| 12 | 3 | 0 | 0 | 1 | 0 | 0 | 20 |
| 3  | 1 | 1 | 0 | 0 | 0 | 0 | 20 |
|    | 4 | 0 | 0 | 0 | 1 | 0 | 20 |
| 7  | 3 | 0 | 0 | 1 | 0 | 0 | 20 |
| 5  | 4 | 0 | 0 | 0 | 1 | 0 | 20 |
| 12 | 3 | 0 | 0 | 1 | 0 | 0 | 40 |
| 13 | 3 | 0 | 0 | 1 | 0 | 0 | 20 |
| 6  | 1 | 1 | 0 | 0 | 0 | 0 | 20 |
| 9  | 3 | 0 | 0 | 1 | 0 | 0 | 20 |
| 7  | 1 | 1 | 0 | 0 | 0 | 0 | 20 |
| 8  | 4 | 0 | 0 | 0 | 1 | 0 | 20 |
| 14 | 1 | 1 | 0 | 0 | 0 | 0 | 20 |
| 9  | 1 | 1 | 0 | 0 | 0 | 0 | 40 |
| 6  | 3 | 0 | 0 | 1 | 0 | 0 | 20 |
| 9  | 4 | 0 | 0 | 0 | 1 | 0 | 20 |
| 8  | 3 | 0 | 0 | 1 | 0 | 0 | 10 |
| 12 | 3 | 0 | 0 | 1 | 0 | 0 | 20 |
| 8  | 2 | 0 | 1 | 0 | 0 | 0 | 15 |
| 9  | 2 | 0 | 1 | 0 | 0 | 0 | 30 |
| 10 | 1 | 1 | 0 | 0 | 0 | 0 | 20 |
| 7  | 1 | 1 | 0 | 0 | 0 | 0 | 20 |
| 12 | 1 | 1 | 0 | 0 | 0 | 0 | 20 |
| 8  | 3 | 0 | 0 | 1 | 0 | 0 | 20 |
| 13 | 1 | 1 | 0 | 0 | 0 | 0 | 20 |
| 11 | 1 | 1 | 0 | 0 | 0 | 0 | 20 |
| 4  | 4 | 0 | 0 | 0 | 1 | 0 | 20 |
| 10 | 1 | 1 | 0 | 0 | 0 | 0 | 20 |
| 5  | 1 | 1 | 0 | 0 | 0 | 0 | 40 |
| 10 | 1 | 1 | 0 | 0 | 0 | 0 | 40 |
| 7  | 3 | 0 | 0 | 1 | 0 | 0 | 20 |
| 8  | 4 | 0 | 0 | 0 | 1 | 0 | 20 |
| 8  | 1 | 1 | 0 | 0 | 0 | 0 | 10 |
| 8  | 3 | 0 | 0 | 1 | 0 | 0 | 10 |
| 13 | 3 | 0 | 0 | 1 | 0 | 0 | 20 |

|    |   |   |   |   |   |   |    |
|----|---|---|---|---|---|---|----|
| 5  | 1 | 1 | 0 | 0 | 0 | 0 | 20 |
|    | 4 | 0 | 0 | 0 | 1 | 0 | 20 |
|    | 3 | 0 | 0 | 1 | 0 | 0 | 10 |
| 10 | 1 | 1 | 0 | 0 | 0 | 0 | 20 |
| 9  | 1 | 1 | 0 | 0 | 0 | 0 | 40 |
| 10 | 4 | 0 | 0 | 0 | 1 | 0 | 40 |
| 9  | 5 | 0 | 0 | 0 | 0 | 1 | 10 |
|    | 4 | 0 | 0 | 0 | 1 | 0 | 40 |
| 14 | 4 | 0 | 0 | 0 | 1 | 0 | 40 |
| 7  | 4 | 0 | 0 | 0 | 1 | 0 | 20 |
| 7  | 3 | 0 | 0 | 1 | 0 | 0 | 10 |
| 10 | 5 | 0 | 0 | 0 | 0 | 1 | 20 |
| 3  | 1 | 1 | 0 | 0 | 0 | 0 | 40 |
| 9  | 1 | 1 | 0 | 0 | 0 | 0 | 20 |
| 5  | 2 | 0 | 1 | 0 | 0 | 0 | 15 |
| 9  | 3 | 0 | 0 | 1 | 0 | 0 | 20 |
|    | 4 | 0 | 0 | 0 | 1 | 0 | 20 |
| 8  | 5 | 0 | 0 | 0 | 0 | 1 | 10 |
| 12 | 5 | 0 | 0 | 0 | 0 | 1 | 20 |
| 9  | 1 | 1 | 0 | 0 | 0 | 0 | 40 |
| 10 | 1 | 1 | 0 | 0 | 0 | 0 | 40 |
| 10 | 1 | 1 | 0 | 0 | 0 | 0 | 40 |
| 5  | 1 | 1 | 0 | 0 | 0 | 0 | 20 |
| 8  | 1 | 1 | 0 | 0 | 0 | 0 | 20 |
| 14 | 1 | 1 | 0 | 0 | 0 | 0 | 20 |
| 3  | 1 | 1 | 0 | 0 | 0 | 0 | 40 |
| 13 | 1 | 1 | 0 | 0 | 0 | 0 | 20 |
| 15 | 1 | 1 | 0 | 0 | 0 | 0 | 20 |
| 9  | 1 | 1 | 0 | 0 | 0 | 0 | 40 |
| 10 | 4 | 0 | 0 | 0 | 1 | 0 | 20 |
| 8  | 1 | 1 | 0 | 0 | 0 | 0 | 20 |
| 7  | 1 | 1 | 0 | 0 | 0 | 0 | 20 |
| 12 | 2 | 0 | 1 | 0 | 0 | 0 | 30 |
| 11 | 1 | 1 | 0 | 0 | 0 | 0 | 20 |
| 10 | 1 | 1 | 0 | 0 | 0 | 0 | 20 |
| 7  | 1 | 1 | 0 | 0 | 0 | 0 | 40 |
| 8  | 1 | 1 | 0 | 0 | 0 | 0 | 20 |
| 10 | 1 | 1 | 0 | 0 | 0 | 0 | 40 |
| 6  | 4 | 0 | 0 | 0 | 1 | 0 | 20 |
| 12 | 1 | 1 | 0 | 0 | 0 | 0 | 20 |
| 14 | 4 | 0 | 0 | 0 | 1 | 0 | 20 |
| 12 | 4 | 0 | 0 | 0 | 1 | 0 | 20 |
| 7  | 1 | 1 | 0 | 0 | 0 | 0 | 20 |
| 10 | 4 | 0 | 0 | 0 | 1 | 0 | 20 |
| 12 | 5 | 0 | 0 | 0 | 0 | 1 | 20 |
| 6  | 1 | 1 | 0 | 0 | 0 | 0 | 20 |
| 8  | 2 | 0 | 1 | 0 | 0 | 0 | 30 |
| 8  | 1 | 1 | 0 | 0 | 0 | 0 | 40 |
| 7  | 1 | 1 | 0 | 0 | 0 | 0 | 20 |
| 9  | 1 | 1 | 0 | 0 | 0 | 0 | 20 |
| 14 | 1 | 1 | 0 | 0 | 0 | 0 | 20 |
| 4  | 3 | 0 | 0 | 1 | 0 | 0 | 20 |
| 10 | 1 | 1 | 0 | 0 | 0 | 0 | 20 |
| 6  | 1 | 1 | 0 | 0 | 0 | 0 | 20 |
| 10 | 4 | 0 | 0 | 0 | 1 | 0 | 20 |
| 10 | 3 | 0 | 0 | 1 | 0 | 0 | 20 |

|   |   |   |   |   |   |   |    |
|---|---|---|---|---|---|---|----|
| 8 | 2 | 0 | 1 | 0 | 0 | 0 | 30 |
| 8 | 5 | 0 | 0 | 0 | 0 | 1 | 10 |
| 6 | 1 | 1 | 0 | 0 | 0 | 0 | 20 |



| DoseIPP | HeureIPP | DébutIPP | IPPConforme | IPPAppIndic |
|---------|----------|----------|-------------|-------------|
| 1       | 2        | 3        | 0           |             |
| 2       | 3        | 3        | 0           |             |
| 1       | 3        | 1        | 0           |             |
| 2       | 3        | 4        | 0           |             |
| 1       | 1        | 4        | 0           |             |
| 2       | 1        | 4        | 0           |             |
| 1       | 1        | 3        | 0           |             |
| 2       | 3        | 1        | 1           | 2           |
| 1       | 1        | 4        | 0           |             |
| 1       | 1        | 4        | 0           |             |
| 2       | 3        | 3        | 1           | 1           |
| 2       | 3        | 2        | 0           |             |
| 1       | 1        | 3        | 1           | 1           |
| 1       | 3        | 3        | 0           |             |
| 1       | 1        | 3        | 1           | 1           |
| 2       | 3        | 3        | 1           | 1           |
| 1       | 3        | 4        | 0           |             |
| 1       | 3        | 3        | 0           |             |
| 2       | 3        | 3        | 0           |             |
| 1       | 1        | 2        | 1           | 1           |
| 2       | 5        | 3        | 0           |             |
| 1       | 3        | 2        | 0           |             |
| 1       | 3        | 2        | 0           |             |
| 2       | 3        | 3        | 1           | 3           |
| 1       | 3        | 4        | 0           |             |
| 2       | 3        | 3        | 0           |             |
| 2       | 2        | 1        | 0           |             |
| 2       | 1        | 3        | 0           |             |
| 1       | 1        | 2        | 0           |             |
| 1       | 1        | 2        | 1           | 1           |
| 1       | 3        | 4        | 0           |             |
| 1       | 1        | 3        | 0           |             |
| 1       | 3        | 3        | 0           |             |
| 1       | 3        | 4        | 0           |             |
| 2       | 3        | 3        | 0           |             |
| 2       | 3        | 3        | 0           |             |
| 1       | 3        | 4        | 0           |             |
| 2       | 3        | 3        | 0           |             |
| 1       | 3        | 1        | 1           | 5           |
| 1       | 3        | 4        | 0           |             |
| 1       | 3        | 2        | 0           |             |
| 1       | 1        | 4        | 0           |             |
| 1       | 3        | 3        | 1           | 3           |
| 1       | 3        | 2        | 0           |             |
| 1       | 3        | 4        | 0           |             |
| 1       | 3        | 4        | 0           |             |
| 2       | 1        | 4        | 0           |             |
| 1       | 3        | 4        | 0           |             |
| 2       | 3        | 2        | 0           |             |
| 2       | 3        | 4        | 0           |             |
| 1       | 3        | 4        | 1           | 1           |
| 1       | 3        | 3        | 0           |             |
| 2       | 1        | 3        | 0           |             |

|   |   |   |   |   |
|---|---|---|---|---|
| 2 | 1 | 3 | 0 |   |
| 1 | 3 | 4 | 0 |   |
| 1 | 3 | 3 | 0 |   |
| 2 | 3 | 4 | 0 |   |
| 1 | 3 | 4 | 0 |   |
| 1 | 3 | 4 | 0 |   |
| 2 | 1 | 4 | 1 | 3 |
| 2 | 1 | 3 | 0 |   |
| 1 | 3 | 3 | 0 |   |
| 2 | 3 | 4 | 0 |   |
| 1 | 3 | 3 | 0 |   |
| 1 | 3 | 4 | 0 |   |
| 1 | 3 | 4 | 0 |   |
| 2 | 1 | 3 | 0 |   |
| 1 | 3 | 2 | 0 |   |
| 1 | 3 | 1 | 1 | 3 |
| 2 | 3 | 3 | 0 |   |
| 1 | 1 | 4 | 0 |   |
| 1 | 1 | 4 | 0 |   |
| 2 | 3 | 1 | 1 | 3 |
| 2 | 3 | 4 | 0 |   |
| 2 | 3 | 1 | 1 | 1 |
| 2 | 1 | 4 | 0 |   |
| 2 | 3 | 1 | 0 |   |
| 1 | 3 | 4 | 0 |   |
| 1 | 3 | 4 | 0 |   |
| 1 | 3 | 2 | 0 |   |
| 2 | 3 | 4 | 0 |   |
| 1 | 3 | 4 | 0 |   |
| 1 | 3 | 4 | 0 |   |
| 1 | 3 | 4 | 0 |   |
| 2 | 3 | 4 | 0 |   |
| 1 | 3 | 4 | 0 |   |
| 1 | 3 | 2 | 0 |   |
| 2 | 3 | 3 | 0 |   |
| 2 | 1 | 3 | 1 | 1 |
| 1 | 3 | 4 | 0 |   |
| 2 | 1 | 4 | 0 |   |
| 1 | 3 | 3 | 0 |   |
| 2 | 3 | 3 | 0 |   |
| 2 | 3 | 1 | 1 | 2 |
| 1 | 3 | 4 | 0 |   |
| 1 | 3 | 3 | 1 | 1 |
| 2 | 3 | 3 | 0 |   |
| 1 | 3 | 2 | 0 |   |
| 2 | 3 | 3 | 1 | 2 |
| 1 | 3 | 4 | 0 |   |
| 1 | 3 | 4 | 0 |   |
| 2 | 3 | 4 | 0 |   |
| 1 | 3 | 3 | 0 |   |
| 2 | 3 | 3 | 1 | 1 |
| 1 | 3 | 3 | 1 | 1 |
| 1 | 3 | 2 | 0 |   |
| 1 | 3 | 3 | 0 |   |
| 1 | 3 | 3 | 0 |   |
| 2 | 3 | 4 | 0 |   |

|   |   |   |   |   |
|---|---|---|---|---|
| 2 | 3 | 4 | 0 |   |
| 2 | 1 | 4 | 0 |   |
| 2 | 3 | 3 | 0 |   |
| 2 | 5 | 2 | 1 | 2 |
| 1 | 3 | 3 | 0 |   |
| 2 | 1 | 4 | 0 |   |
| 1 | 3 | 4 | 0 |   |
| 2 | 1 | 4 | 0 |   |
| 2 | 3 | 4 | 0 |   |
| 2 | 3 | 3 | 0 |   |
| 1 | 3 | 2 | 0 |   |
| 2 | 3 | 4 | 0 |   |
| 2 | 1 | 4 | 0 |   |
| 2 | 3 | 3 | 1 | 6 |
| 1 | 3 | 2 | 0 |   |
| 1 | 3 | 3 | 0 |   |
| 2 | 1 | 2 | 1 | 2 |
| 1 | 3 | 4 | 0 |   |
| 1 | 3 | 3 | 0 |   |
| 1 | 3 | 3 | 1 | 1 |
| 1 | 3 | 3 | 1 | 2 |
| 2 | 1 | 4 | 0 |   |
| 1 | 3 | 3 | 0 |   |
| 2 | 3 | 2 | 1 | 1 |
| 1 | 3 | 3 | 0 |   |
| 1 | 3 | 2 | 1 | 1 |
| 1 | 3 | 2 | 0 |   |
| 2 | 3 | 1 | 0 |   |
| 1 | 3 | 2 | 0 |   |
| 2 | 1 | 2 | 0 |   |
| 2 | 3 | 2 | 1 | 2 |
| 1 | 1 | 3 | 1 | 1 |
| 1 | 3 | 4 | 0 |   |
| 2 | 3 | 3 | 0 |   |
| 2 | 3 | 4 | 0 |   |
| 2 | 5 | 3 | 0 |   |
| 1 | 3 | 3 | 1 | 1 |
| 1 | 3 | 4 | 0 |   |
| 1 | 3 | 3 | 1 | 3 |
| 1 | 1 | 4 | 0 |   |
| 1 | 1 | 4 | 0 |   |
| 2 | 3 | 4 | 0 |   |
| 1 | 3 | 3 | 1 | 2 |
| 1 | 1 | 4 | 0 |   |
| 1 | 3 | 2 | 0 |   |
| 2 | 3 | 4 | 1 | 1 |
| 2 | 1 | 1 | 1 | 2 |
| 1 | 1 | 2 | 1 | 6 |
| 1 | 3 | 4 | 1 | 1 |
| 2 | 3 | 4 | 0 |   |
| 1 | 1 | 3 | 1 | 1 |
| 1 | 3 | 2 | 0 |   |
| 1 | 1 | 2 | 0 |   |
| 2 | 3 | 3 | 1 | 2 |
| 1 | 3 | 3 | 1 | 3 |

|   |   |   |   |   |
|---|---|---|---|---|
| 2 | 3 | 4 | 0 |   |
| 1 | 3 | 4 | 0 |   |
| 1 | 3 | 4 | 0 |   |
| 1 | 3 | 4 | 0 |   |
| 2 | 3 | 4 | 1 | 2 |
| 1 | 3 | 4 | 0 |   |
| 1 | 3 | 4 | 0 |   |
| 1 | 1 | 2 | 1 | 1 |
| 1 | 3 | 4 | 0 |   |
| 1 | 3 | 3 | 1 | 1 |
| 1 | 3 | 1 | 1 | 3 |
| 2 | 3 | 4 | 0 |   |
| 1 | 3 | 4 | 0 |   |
| 1 | 3 | 4 | 0 |   |
| 1 | 3 | 3 | 0 |   |
| 1 | 3 | 3 | 0 |   |
| 1 | 3 | 2 | 0 |   |
| 2 | 1 | 4 | 0 |   |
| 1 | 3 | 1 | 1 | 1 |
| 1 | 3 | 4 | 0 |   |
| 2 | 3 | 4 | 0 |   |
| 2 | 3 | 3 | 1 | 1 |
| 2 | 3 | 2 | 1 | 3 |
| 1 | 3 | 3 | 1 | 1 |
| 1 | 3 | 2 | 0 |   |
| 2 | 3 | 4 | 0 |   |
| 1 | 1 | 4 | 0 |   |
| 2 | 3 | 2 | 1 | 3 |
| 2 | 1 | 2 | 1 | 3 |
| 1 | 3 | 4 | 0 |   |
| 2 | 3 | 2 | 1 | 1 |
| 1 | 3 | 3 | 0 |   |
| 1 | 3 | 1 | 1 | 2 |
| 1 | 3 | 4 | 0 |   |
| 2 | 3 | 2 | 1 | 6 |
| 2 | 3 | 4 | 0 |   |
| 1 | 3 | 4 | 1 | 1 |
| 1 | 3 | 4 | 0 |   |
| 2 | 3 | 4 | 0 |   |
| 1 | 3 | 4 | 1 | 1 |
| 2 | 5 | 1 | 1 | 6 |
| 1 | 3 | 2 | 1 | 1 |
| 1 | 3 | 2 | 0 |   |
| 1 | 3 | 3 | 0 |   |
| 2 | 3 | 4 | 1 | 1 |
| 1 | 3 | 3 | 0 |   |
| 1 | 3 | 1 | 0 |   |
| 1 | 1 | 4 | 1 | 1 |
| 1 | 3 | 1 | 0 |   |
| 2 | 1 | 1 | 1 | 1 |
| 1 | 3 | 4 | 0 |   |
| 1 | 3 | 3 | 0 |   |
| 1 | 3 | 4 | 0 |   |
| 1 | 3 | 3 | 0 |   |
| 2 | 3 | 4 | 0 |   |
| 2 | 1 | 2 | 0 | 0 |

|   |   |   |   |        |
|---|---|---|---|--------|
| 2 | 1 | 3 | 0 |        |
| 1 | 1 | 3 | 0 |        |
| 1 | 1 | 2 | 0 |        |
| 1 | 2 | 2 | 0 |        |
| 2 |   | 3 | 1 | 1      |
| 1 | 3 | 2 | 0 |        |
| 1 | 1 | 2 | 1 | 1      |
| 1 |   | 2 | 0 | 0      |
| 1 | 3 | 3 | 0 |        |
| 2 | 3 | 4 | 0 |        |
| 2 | 3 | 3 | 1 | 3      |
| 1 | 4 | 2 | 1 | 1      |
| 2 | 3 | 2 | 0 | 0      |
| 1 | 3 | 3 | 0 |        |
| 1 | 3 | 1 | 1 | 1      |
| 2 | 3 | 4 | 0 |        |
| 1 |   | 3 | 1 | 1 et 3 |
| 1 | 3 | 4 | 0 |        |
| 2 | 1 | 4 | 0 |        |
| 2 | 3 | 4 | 0 |        |
| 2 | 3 | 1 | 1 | 3      |
| 2 | 1 | 4 | 0 |        |
| 1 | 3 | 3 | 0 |        |
| 1 | 3 | 1 | 0 | 0      |
| 1 | 3 | 4 | 0 |        |
| 2 | 3 | 3 | 0 |        |
| 1 | 3 | 4 | 0 |        |
| 1 | 1 | 4 | 0 |        |
| 2 | 1 | 2 | 0 |        |
| 1 | 3 | 3 | 0 |        |
| 1 | 3 | 3 | 0 | 0      |
| 1 | 3 | 3 | 1 | 3      |
| 2 | 1 | 3 | 1 | 1      |
| 1 | 3 | 4 | 0 |        |
| 1 | 1 | 2 | 0 |        |
| 2 | 1 | 1 | 0 | 0      |
| 1 | 1 | 3 | 0 |        |
| 2 | 3 | 2 | 1 | 6      |
| 1 | 3 | 3 | 0 | 0      |
| 1 | 3 | 3 | 0 |        |
| 1 | 1 | 4 | 0 |        |
| 1 | 3 | 3 | 0 |        |
| 1 | 3 | 2 | 0 |        |
| 1 | 3 | 4 | 0 |        |
| 2 | 3 | 3 | 1 | 6      |
| 1 | 3 | 3 | 0 |        |
| 2 | 1 | 3 | 0 |        |
| 2 | 3 | 3 | 0 |        |
| 1 | 3 | 2 | 0 |        |
| 1 | 3 | 1 | 1 | 1      |
| 1 |   | 3 | 0 |        |
| 2 | 3 |   | 0 |        |
| 1 | 3 | 3 | 0 |        |
| 1 | 3 | 2 | 0 |        |
| 1 | 3 | 3 | 0 |        |
| 2 | 3 | 3 | 0 |        |

|   |   |   |   |   |
|---|---|---|---|---|
| 2 | 3 | 3 | 0 |   |
| 1 | 3 | 1 | 1 | 1 |
| 1 | 3 | 3 | 0 |   |













|   |   |   |   |   |
|---|---|---|---|---|
| 0 | 0 | 0 | 0 | 0 |
| 1 | 0 | 0 | 0 | 0 |
| 0 | 0 | 0 | 0 | 0 |

| IndicApp_6 | Dernière FOGD | IPPinapplIndic | IndicInapp_1 | IndicInapp_2 |
|------------|---------------|----------------|--------------|--------------|
| 0          |               | 1 et 6         | 1            | 0            |
| 0          |               | 1 et 3 et 4    | 1            | 0            |
| 0          |               | 4 et 7         | 0            | 0            |
| 0          |               | 1              | 1            | 0            |
| 0          |               | 1 et 5         | 1            | 0            |
| 0          |               | 1 et 5 et 6    | 1            | 0            |
| 0          |               | 1 et 3 et 6    | 1            | 0            |
| 0          |               |                | 0            | 0            |
| 0          |               | 1 et 4         | 1            | 0            |
| 0          |               | 1 et 4         | 1            | 0            |
| 0          | 3             | 1              | 0            | 0            |
| 0          |               | 3 et 4         | 0            | 0            |
| 0          | 3             | 1              | 0            | 0            |
| 0          |               | 2 et 6         | 0            | 1            |
| 0          | 3             |                | 0            | 0            |
| 0          | 3             | 4              | 0            | 0            |
| 0          |               | 4              | 0            | 0            |
| 0          |               | 3 et 4         | 0            | 0            |
| 0          |               | 1 et 3         | 1            | 0            |
| 0          | 3             | 6              | 0            | 0            |
| 0          |               | 6              | 0            | 0            |
| 0          |               | 1 et 6         | 1            | 0            |
| 0          |               | 3              | 0            | 0            |
| 0          |               | 4              | 0            | 0            |
| 0          |               | 1 et 4         | 1            | 0            |
| 0          |               | 1              | 1            | 0            |
| 0          |               | 4              | 0            | 0            |
| 0          |               | 1 et 3         | 1            | 0            |
| 0          |               | 4              | 0            | 0            |
| 0          | 2             | 7              | 0            | 0            |
| 0          |               | 1 et 3 et 7    | 1            | 0            |
| 0          |               | 1 et 3 et 4    | 1            | 0            |
| 0          |               | 1 et 6         | 1            | 0            |
| 0          |               | 1              | 1            | 0            |
| 0          |               | 1 et 4         | 1            | 0            |
| 0          |               | 3              | 0            | 0            |
| 0          |               | 4 et 5         | 0            | 0            |
| 0          |               | 4              | 0            | 0            |
| 0          |               | 4              | 0            | 0            |
| 0          |               | 1 et 4 et 5    | 1            | 0            |
| 0          |               | 1 et 7         | 1            | 0            |
| 0          |               | 1 et 6         | 1            | 0            |
| 0          |               | 4              | 0            | 0            |
| 0          |               | 2 et 5         | 0            | 1            |
| 0          |               | 2              | 0            | 1            |
| 0          |               | 3 et 6         | 0            | 0            |
| 0          |               | 6              | 0            | 0            |
| 0          |               | 1              | 1            | 0            |
| 0          |               | 1 et 4         | 1            | 0            |
| 0          |               | 7              | 0            | 0            |
| 0          | 3             | 7              | 0            | 0            |
| 0          |               | 1 et 4 et 5    | 1            | 0            |
| 0          |               | 4              | 0            | 0            |

|   |   |                  |   |   |
|---|---|------------------|---|---|
| 0 |   | 1                | 1 | 0 |
| 0 |   | 1                | 1 | 0 |
| 0 |   | 1 et 6           | 1 | 0 |
| 0 |   | 1 et 6           | 1 | 0 |
| 0 |   | 1                | 1 | 0 |
| 0 |   | 1 et 4           | 1 | 0 |
| 0 |   |                  | 0 | 0 |
| 0 |   | 1 et 4           | 1 | 0 |
| 0 |   | 1 et 4           | 1 | 0 |
| 0 |   | 1                | 1 | 0 |
| 0 |   | 1 et 4 et 5      | 1 | 0 |
| 0 |   | 3 et 2 et 6      | 0 | 1 |
| 0 |   | 1 et 4           | 1 | 0 |
| 0 |   | 1                | 1 | 0 |
| 0 |   |                  | 0 | 0 |
| 0 |   | 1                | 1 | 0 |
| 0 |   | 2                | 0 | 1 |
| 0 |   | 3                | 0 | 0 |
| 0 |   |                  | 0 | 0 |
| 0 |   | 3                | 0 | 0 |
| 0 | 3 | 6                | 0 | 0 |
| 0 |   | 1 et 4 et 5      | 1 | 0 |
| 0 |   | 3 et 6           | 0 | 0 |
| 0 |   | 4                | 0 | 0 |
| 0 |   | 1 et 5 et 6      | 1 | 0 |
| 0 |   | 2                | 0 | 1 |
| 0 |   | 3                | 0 | 0 |
| 0 |   | 2                | 0 | 1 |
| 0 |   | 1 et 6           | 1 | 0 |
| 0 |   | 1 et 5 et 6      | 1 | 0 |
| 0 |   | 1 et 7           | 1 | 0 |
| 0 |   | 1                | 1 | 0 |
| 0 |   | 1 et 9           | 1 | 0 |
| 0 |   | 1 et 6           | 1 | 0 |
| 0 | 3 | 7                | 0 | 0 |
| 0 |   | 4                | 0 | 0 |
| 0 |   | 7                | 0 | 0 |
| 0 |   | 4                | 0 | 0 |
| 0 |   | 3 et 7           | 0 | 0 |
| 0 |   | 3                | 0 | 0 |
| 0 |   | 1 et 4           | 1 | 0 |
| 0 | 3 | 6                | 0 | 0 |
| 0 |   | 2                | 0 | 1 |
| 0 |   | 3 et 5 et 6 et 9 | 0 | 0 |
| 0 |   | 4                | 0 | 0 |
| 0 |   | 1 et 7           | 1 | 0 |
| 0 |   | 6                | 0 | 0 |
| 0 |   | 1 et 3 et 6      | 1 | 0 |
| 0 |   | 3 et 5 et 6      | 0 | 0 |
| 0 | 3 | 4                | 0 | 0 |
| 0 | 3 | 4                | 0 | 0 |
| 0 |   | 1                | 1 | 0 |
| 0 |   | 1 et 4           | 1 | 0 |
| 0 |   | 1 et 7           | 1 | 0 |
| 0 |   | 4                | 0 | 0 |

|   |   |                  |   |   |
|---|---|------------------|---|---|
| 0 |   | 6                | 0 | 0 |
| 0 |   | 1 et 9 et 6      | 1 | 0 |
| 0 |   | 2 et 4 et 7      | 0 | 1 |
| 0 |   |                  | 0 | 0 |
| 0 |   | 6                | 0 | 0 |
| 0 |   | 1 et 4 et 5 et 7 | 1 | 0 |
| 0 |   | 1 et 4           | 1 | 0 |
| 0 |   | 1 et 6           | 1 | 0 |
| 0 |   | 1                | 1 | 0 |
| 0 |   | 1 et 4 et 5      | 1 | 0 |
| 0 |   | 2                | 0 | 1 |
| 0 |   | 3                | 0 | 0 |
| 0 |   | 1 et 4           | 1 | 0 |
| 1 |   | 4                | 0 | 0 |
| 0 |   | 1 et 4           | 1 | 0 |
| 0 |   | 1 et 7           | 1 | 0 |
| 0 |   | 4                | 0 | 0 |
| 0 |   | 1 et 4           | 1 | 0 |
| 0 |   | 3 et 4           | 0 | 0 |
| 0 | 3 |                  | 0 | 0 |
| 0 |   | 5                | 0 | 0 |
| 0 |   | 5                | 0 | 0 |
| 0 |   | 1 et 6           | 1 | 0 |
| 0 | 3 | 3                | 0 | 0 |
| 0 |   | 1 et 5           | 1 | 0 |
| 0 |   | 1 et 4           | 1 | 0 |
| 0 | 3 | 4                | 0 | 0 |
| 0 |   | 6                | 0 | 0 |
| 0 |   | 5                | 0 | 0 |
| 0 |   | 2                | 0 | 1 |
| 0 |   | 4                | 0 | 0 |
| 0 |   |                  | 0 | 0 |
| 0 | 3 | 7                | 0 | 0 |
| 0 |   | 1 et 6           | 1 | 0 |
| 0 |   | 1 et 4           | 1 | 0 |
| 0 |   | 9 et 4           | 0 | 0 |
| 0 |   | 1 et 4           | 1 | 0 |
| 0 | 3 |                  | 0 | 0 |
| 0 |   | 1 et 6           | 1 | 0 |
| 0 |   | 4                | 0 | 0 |
| 0 |   | 4                | 0 | 0 |
| 0 |   | 1                | 1 | 0 |
| 0 |   | 1 et 5           | 1 | 0 |
| 0 |   | 2                | 0 | 1 |
| 0 |   | 3 et 4           | 0 | 0 |
| 0 |   | 4                | 0 | 0 |
| 0 | 3 |                  | 0 | 0 |
| 0 |   | 3                | 0 | 0 |
| 1 |   | 6                | 0 | 0 |
| 0 | 3 | 6                | 0 | 0 |
| 0 |   | 1 ET 4           | 1 | 0 |
| 0 |   | 4                | 0 | 0 |
| 0 |   | 4                | 0 | 0 |
| 0 |   | 6                | 0 | 0 |
| 0 |   | 2                | 0 | 1 |
| 0 |   | 1                | 0 | 0 |

|   |   |         |   |   |
|---|---|---------|---|---|
| 0 |   | 1 ET 5  | 1 | 0 |
| 0 |   | 1       | 1 | 0 |
| 0 |   | 3 ET 4  | 0 | 0 |
| 0 |   | 2 ET 6  | 0 | 1 |
| 0 |   | 3       | 0 | 0 |
| 0 |   | 1       | 1 |   |
| 0 |   | 3 ET 6  | 0 | 0 |
| 0 | 3 |         | 0 | 0 |
| 0 |   | 4       | 0 | 0 |
| 0 | 3 | 6       | 0 | 0 |
| 0 |   | 4       | 0 | 0 |
| 0 |   | 4       | 0 | 0 |
| 0 |   | 1       | 1 | 0 |
| 0 |   | 1       | 1 | 0 |
| 0 |   | 4       | 0 | 0 |
| 0 |   | 4       | 0 | 0 |
| 0 |   | 4       | 0 | 0 |
| 0 |   | 3 ET 5  | 0 | 0 |
| 0 | 3 | 4       | 0 | 0 |
| 0 |   | 5 et 6  | 0 | 0 |
| 0 |   | 1 ET 4  | 1 | 0 |
| 0 | 2 | 3       | 0 | 0 |
| 0 | 3 | 4       | 0 | 0 |
| 0 | 3 | 4       | 0 | 0 |
| 0 |   | 6 ET 3  | 0 | 0 |
| 0 |   | 1       | 1 | 0 |
| 0 |   | 2       | 0 | 1 |
| 0 | 3 | 7       | 0 | 0 |
| 0 | 3 | 4       | 0 | 0 |
| 0 |   | 1 ET 4  | 1 | 0 |
| 0 | 3 | 6       | 0 | 0 |
| 0 |   | 3 ET 7  | 0 | 0 |
| 0 | 1 | 4       | 0 | 0 |
| 0 |   | 6       | 0 | 0 |
| 1 | 3 | 6       | 0 | 0 |
| 0 |   | 5 ET 4  | 0 | 0 |
| 0 | 3 | 6       | 0 | 0 |
| 0 |   | 1 ET 4  | 1 | 0 |
| 0 |   | 6       | 0 | 0 |
| 0 | 3 | 6       | 0 | 0 |
| 1 | 3 | 4       | 0 | 0 |
| 0 | 3 |         | 0 | 0 |
| 0 |   | 9 et 7  | 0 | 0 |
| 0 |   | 4 et 5  | 0 | 0 |
| 0 | 2 | 6       | 0 | 0 |
| 0 |   | 9, 1, 4 | 0 | 0 |
| 0 |   | 4 et 5  | 0 | 0 |
| 0 | 2 | 3       | 0 | 0 |
| 0 |   | 6       | 0 | 0 |
| 0 | 3 |         | 0 | 0 |
| 0 |   | 1 et 4  | 1 | 0 |
| 0 |   | 9 et 2  | 0 | 1 |
| 0 |   | 9, 6    | 0 | 0 |
| 0 |   | 4 et 5  | 0 | 0 |
| 0 |   | 9 et 2? | 0 | 0 |
| 0 |   | 4 et 5  | 0 | 0 |



|   |   |              |   |   |
|---|---|--------------|---|---|
| 0 |   | 1, 4 et 6    | 1 | 0 |
| 0 |   | 3            | 0 | 0 |
| 0 |   | 4            | 0 | 0 |
| 0 |   | 1, 6         | 1 | 0 |
| 0 | 2 | 6            | 0 | 0 |
| 0 |   | 1, 4 et 5    | 1 | 0 |
| 0 | 3 | 6            | 0 | 0 |
| 0 |   | 6            | 0 | 0 |
| 0 |   | 3, 4         | 0 | 0 |
| 0 |   | 1            | 1 | 0 |
| 0 |   |              | 0 | 0 |
| 0 | 2 | 7            | 0 | 0 |
| 0 |   | 2,5,6        | 0 | 1 |
| 0 |   | 8 4          | 0 | 0 |
| 0 | 2 |              | 0 | 0 |
| 0 |   | 9 et 4       | 0 | 0 |
| 0 |   | 4            | 0 | 0 |
| 0 |   | 3 et 6       | 0 | 0 |
| 0 |   | 9, 4         | 0 | 0 |
| 0 |   | 1, 3, 5 et 4 | 1 | 0 |
| 0 |   | 4            | 0 | 0 |
| 0 |   | 9            | 0 | 0 |
| 0 |   | 9            | 0 | 0 |
| 0 |   | 1            | 0 | 0 |
| 0 |   | 9, 7         | 0 | 0 |
| 0 |   | 9            | 0 | 0 |
| 0 |   | 5 et 6       | 0 | 0 |
| 0 |   | 3            | 0 | 0 |
| 0 |   | 1 et 4       | 1 | 0 |
| 0 |   | 1            | 1 | 0 |
| 0 | 3 | 4            | 0 | 0 |
| 0 | 3 | 7            | 0 | 0 |
| 0 | 2 | 6            | 0 | 0 |
| 0 |   | 4            | 0 | 0 |
| 0 |   | 1 et 9 et 4  | 1 | 0 |
| 0 | 3 | 5            | 0 | 0 |
| 0 |   | 8 et 4       | 0 | 0 |
| 1 | 3 |              | 0 | 0 |
| 0 | 3 | 2,5,7        | 0 | 1 |
| 0 |   | 1 et 6       | 1 | 0 |
| 0 |   | 1 et 4       | 1 | 0 |
| 0 |   | 1, 6 et 7    | 1 | 0 |
| 0 |   | 3 et 6       | 0 | 0 |
| 0 |   | 5            | 0 | 0 |
| 1 | 2 | 7            | 0 | 0 |
| 0 |   | 6            | 0 | 0 |
| 0 |   | 6 et 7       | 0 | 0 |
| 0 |   | 1 et 2?      | 1 | 1 |
| 0 |   | 4            | 0 | 0 |
| 0 | 2 | 6            | 0 | 0 |
| 0 |   | 1 et 4       | 1 | 0 |
| 0 |   | 1 et 6       | 1 | 0 |
| 0 |   | 4            | 0 | 0 |
| 0 |   | 6            | 0 | 0 |
| 0 |   | 7            | 0 | 0 |
| 0 |   | 6            | 0 | 0 |

|   |   |        |   |   |
|---|---|--------|---|---|
| 0 |   | 1      | 1 | 0 |
| 0 | 3 | 1      | 0 | 0 |
| 0 |   | 1 et 6 | 1 | 0 |

| Indicnapp_3 | Indicnapp_4 | Indicnapp_5 | Indicnapp_6 | Indicnapp_7 |
|-------------|-------------|-------------|-------------|-------------|
| 0           | 0           | 0           | 1           | 0           |
| 1           | 1           | 0           | 0           | 0           |
| 0           | 1           | 0           | 0           | 1           |
| 0           | 0           | 0           | 0           | 0           |
| 0           | 0           | 1           | 0           | 0           |
| 0           | 0           | 1           | 1           | 0           |
| 1           | 0           | 0           | 1           | 0           |
| 0           | 0           | 0           | 0           | 0           |
| 0           | 1           | 0           | 0           | 0           |
| 0           | 1           | 0           | 0           | 0           |
| 0           | 1           | 0           | 0           | 0           |
| 1           | 0           | 0           | 0           | 0           |
| 0           | 0           | 0           | 1           | 0           |
| 0           | 0           | 0           | 1           | 0           |
| 0           | 0           | 0           | 0           | 0           |
| 1           | 0           | 0           | 1           | 0           |
| 0           | 1           | 0           | 0           | 0           |
| 1           | 4           | 0           | 0           | 0           |
| 0           | 0           | 0           | 0           | 0           |
| 0           | 0           | 0           | 1           | 0           |
| 0           | 0           | 0           | 1           | 0           |
| 1           | 0           | 0           | 0           | 0           |
| 0           | 1           | 0           | 0           | 0           |
| 0           | 1           | 0           | 0           | 0           |
| 0           | 0           | 0           | 0           | 1           |
| 1           | 0           | 0           | 0           | 1           |
| 1           | 1           | 0           | 0           | 0           |
| 0           | 0           | 0           | 1           | 0           |
| 0           | 0           | 0           | 0           | 0           |
| 0           | 1           | 0           | 0           | 0           |
| 1           | 0           | 0           | 0           | 0           |
| 0           | 1           | 1           | 0           | 0           |
| 0           | 1           | 0           | 0           | 0           |
| 1           | 0           | 0           | 6           | 0           |
| 0           | 1           | 1           | 0           | 0           |
| 0           | 0           | 0           | 0           | 1           |
| 0           | 0           | 0           | 1           | 0           |
| 0           | 1           | 0           | 0           | 0           |
| 0           | 0           | 1           | 0           | 0           |
| 0           | 0           | 0           | 0           | 0           |
| 1           | 0           | 0           | 1           | 0           |
| 0           | 0           | 0           | 1           | 0           |
| 0           | 0           | 0           | 0           | 0           |
| 0           | 1           | 0           | 0           | 0           |
| 0           | 0           | 0           | 0           | 1           |
| 0           | 0           | 0           | 0           | 1           |
| 0           | 1           | 1           | 0           | 0           |
| 0           | 1           | 0           | 0           | 0           |



|   |   |   |   |   |
|---|---|---|---|---|
| 0 | 0 | 0 | 1 | 0 |
| 0 | 0 | 0 | 1 | 0 |
| 0 | 1 | 0 | 0 | 1 |
| 0 | 0 | 0 | 0 | 0 |
| 0 | 0 | 0 | 1 | 0 |
| 0 | 1 | 1 | 0 | 1 |
| 0 | 1 | 0 | 0 | 0 |
| 0 | 0 | 0 | 1 | 0 |
| 0 | 0 | 0 | 0 | 0 |
| 0 | 1 | 1 | 0 | 0 |
| 0 | 0 | 0 | 0 | 0 |
| 1 | 0 | 0 | 0 | 0 |
| 0 | 1 | 0 | 0 | 0 |
| 0 | 1 | 0 | 0 | 0 |
| 0 | 1 | 0 | 0 | 0 |
| 0 | 0 | 0 | 0 | 1 |
| 0 | 1 | 0 | 0 | 0 |
| 0 | 1 | 0 | 0 | 0 |
| 1 | 1 | 0 | 0 | 0 |
| 0 | 0 | 0 | 0 | 0 |
| 0 | 0 | 1 | 0 | 1 |
| 0 | 0 | 1 | 0 | 0 |
| 0 | 0 | 0 | 1 | 0 |
| 1 | 0 | 0 | 0 | 0 |
| 0 | 0 | 1 | 0 | 0 |
| 0 | 1 | 0 | 0 | 0 |
| 0 | 1 | 0 | 0 | 0 |
| 0 | 0 | 0 | 1 | 0 |
| 0 | 0 | 1 | 0 | 0 |
| 0 | 0 | 0 | 0 | 0 |
| 0 | 1 | 0 | 0 | 0 |
| 0 | 0 | 0 | 0 | 0 |
| 0 | 0 | 0 | 0 | 1 |
| 0 | 0 | 0 | 1 | 0 |
| 0 | 1 | 0 | 0 | 0 |
| 0 | 1 | 0 | 0 | 0 |
| 0 | 1 | 0 | 0 | 0 |
| 0 | 0 | 0 | 0 | 0 |
| 0 | 0 | 0 | 1 | 0 |
| 0 | 1 | 1 | 0 | 0 |
| 0 | 1 | 0 | 0 | 0 |
| 0 | 0 | 0 | 0 | 0 |
| 0 | 0 | 1 | 0 | 0 |
| 1 | 1 | 0 | 0 | 0 |
| 1 | 1 | 0 | 0 | 0 |
| 0 | 1 | 0 | 0 | 0 |
| 0 | 0 | 0 | 0 | 0 |
| 0 | 0 | 1 | 0 | 0 |
| 0 | 1 | 0 | 0 | 0 |
| 0 | 1 | 0 | 0 | 0 |
| 0 | 1 | 0 | 0 | 0 |
| 0 | 0 | 0 | 1 | 0 |
| 1 | 0 | 0 | 0 | 0 |
| 0 | 0 | 0 | 1 | 0 |
| 0 | 0 | 0 | 1 | 0 |
| 0 | 1 | 0 | 0 | 0 |
| 0 | 1 | 0 | 0 | 0 |
| 0 | 0 | 0 | 1 | 0 |
| 1 | 0 | 0 | 0 | 0 |
| 0 | 1 | 0 | 0 | 0 |

|   |   |   |   |   |
|---|---|---|---|---|
| 0 | 0 | 1 | 0 | 0 |
| 0 | 0 | 0 | 0 | 0 |
| 1 | 1 | 0 | 0 | 0 |
| 0 | 0 | 0 | 1 | 0 |
| 1 | 0 | 0 | 0 | 0 |
|   |   |   |   |   |
| 1 | 0 | 0 | 1 | 0 |
| 0 | 0 | 0 | 0 | 0 |
| 0 | 1 | 0 | 0 | 0 |
| 0 | 0 | 0 | 1 | 0 |
| 0 | 1 | 0 | 0 | 0 |
| 0 | 1 | 0 | 0 | 0 |
| 0 | 0 | 0 | 0 | 0 |
| 0 | 0 | 0 | 0 | 0 |
| 0 | 1 | 0 | 0 | 0 |
| 0 | 1 | 0 | 0 | 0 |
| 0 | 1 | 0 | 0 | 0 |
| 1 | 0 | 1 | 0 | 0 |
| 0 | 1 | 0 | 0 | 0 |
| 0 | 0 | 1 | 1 | 0 |
| 0 | 1 | 0 | 0 | 0 |
| 1 | 0 | 0 | 0 | 0 |
| 0 | 1 | 0 | 0 | 0 |
| 0 | 1 | 0 | 0 | 0 |
| 0 | 0 | 0 | 0 | 0 |
| 0 | 0 | 0 | 0 | 0 |
| 0 | 0 | 0 | 0 | 0 |
| 0 | 0 | 0 | 0 | 1 |
| 0 | 1 | 0 | 0 | 0 |
| 0 | 0 | 0 | 1 | 0 |
| 0 | 0 | 0 | 0 | 0 |
| 0 | 0 | 0 | 1 | 0 |
| 0 | 0 | 0 | 1 | 0 |
| 0 | 1 | 0 | 0 | 0 |
| 0 | 0 | 0 | 0 | 0 |
| 0 | 0 | 0 | 1 | 0 |
| 0 | 1 | 0 | 0 | 0 |
| 0 | 0 | 0 | 0 | 0 |
| 0 | 0 | 0 | 1 | 0 |
| 0 | 0 | 0 | 1 | 0 |
| 0 | 1 | 0 | 0 | 0 |
| 0 | 0 | 0 | 0 | 0 |
| 0 | 0 | 0 | 0 | 1 |
| 0 | 1 | 1 | 0 | 0 |
| 0 | 0 | 0 | 1 | 0 |
| 0 | 1 | 1 | 0 | 0 |
| 1 | 0 | 0 | 0 | 0 |
| 0 | 0 | 0 | 1 | 0 |
| 0 | 0 | 0 | 0 | 0 |
| 0 | 1 | 0 | 0 | 0 |
| 0 | 0 | 0 | 0 | 0 |
| 0 | 0 | 0 | 1 | 0 |
| 0 | 1 | 1 | 0 | 0 |
| 0 | 0 | 0 | 0 | 0 |
| 0 | 1 | 1 | 0 | 0 |
| 0 | 0 | 0 | 0 | 0 |
| 0 | 1 | 1 | 0 | 0 |
| 0 | 0 | 0 | 0 | 0 |
| 0 | 1 | 1 | 0 | 0 |

|   |   |   |   |   |
|---|---|---|---|---|
| 0 | 1 | 0 | 1 | 0 |
| 1 | 0 | 0 | 0 | 0 |
| 0 | 1 | 0 | 0 | 0 |
| 0 | 0 | 0 | 6 | 0 |
| 0 | 0 | 0 | 6 | 0 |
| 0 | 1 | 1 | 0 | 0 |
| 0 | 0 | 0 | 1 | 0 |
| 0 | 0 | 0 | 6 | 0 |
| 1 | 1 | 0 | 0 | 0 |
| 0 | 0 | 0 | 0 | 0 |
| 0 | 0 | 0 | 0 | 0 |
| 0 | 0 | 0 | 0 | 1 |
| 0 | 0 | 1 | 1 | 0 |
| 0 | 1 | 0 | 0 | 0 |
| 0 | 1 | 0 | 0 | 0 |
| 0 | 1 | 0 | 0 | 0 |
| 0 | 1 | 0 | 0 | 0 |
| 1 | 0 | 0 | 1 | 0 |
| 0 | 1 | 0 | 0 | 0 |
| 1 | 1 | 1 | 0 | 0 |
| 0 | 1 | 0 | 0 | 0 |
| 0 | 0 | 0 | 1 | 0 |
| 0 | 0 | 0 | 0 | 0 |
| 0 | 1 | 0 | 0 | 0 |
| 0 | 0 | 0 | 0 | 1 |
| 0 | 0 | 0 | 0 | 0 |
| 0 | 0 | 1 | 1 | 0 |
| 1 | 1 | 0 | 0 | 0 |
| 0 | 1 | 0 | 0 | 0 |
| 0 | 0 | 0 | 1 | 0 |
| 0 | 1 | 0 | 0 | 0 |
| 0 | 1 | 0 | 0 | 0 |
| 0 | 1 | 1 | 0 | 0 |
| 0 | 1 | 0 | 0 | 0 |
| 0 | 0 | 0 | 0 | 0 |
| 0 | 0 | 1 | 0 | 1 |
| 0 | 0 | 0 | 1 | 0 |
| 0 | 1 | 0 | 0 | 0 |
| 0 | 0 | 0 | 1 | 1 |
| 1 | 0 | 0 | 1 | 0 |
| 0 | 0 | 1 | 0 | 0 |
| 0 | 0 | 0 | 0 | 1 |
| 0 | 0 | 0 | 1 | 0 |
| 0 | 0 | 0 | 1 | 1 |
| 0 | 1 | 0 | 0 | 0 |
| 0 | 0 | 0 | 1 | 0 |
| 0 | 0 | 0 | 1 | 0 |
| 0 | 0 | 0 | 1 | 0 |
| 0 | 1 | 0 | 0 | 0 |
| 0 | 0 | 0 | 1 | 0 |
| 0 | 0 | 0 | 1 | 0 |
| 0 | 0 | 0 | 1 | 0 |
| 0 | 0 | 0 | 0 | 1 |
| 0 | 0 | 0 | 0 | 1 |
| 0 | 0 | 0 | 1 | 0 |

|   |   |   |   |   |
|---|---|---|---|---|
| 0 | 0 | 0 | 0 | 0 |
| 0 | 0 | 0 | 0 | 1 |
| 0 | 0 | 0 | 1 | 0 |













|   |   |  |
|---|---|--|
| 0 | 0 |  |
| 0 | 0 |  |
| 0 | 0 |  |

| CIRS_A | CIRS_B | CIRS_C | CIRS_D | CIRS_E | CIRS_F | CIRS_G |
|--------|--------|--------|--------|--------|--------|--------|
| 3      | 0      | 2      | 2      | 0      | 0      | 0      |
| 3      | 2      | 0      | 0      | 0      | 0      | 0      |
| 3      | 2      | 2      | 0      | 0      | 0      | 1      |
| 2      | 2      | 4      | 0      | 0      | 0      | 0      |
| 0      | 2      | 0      | 0      | 0      | 0      | 1      |
| 1      | 2      | 3      | 0      | 0      | 3      | 1      |
| 1      | 1      | 0      | 0      | 0      | 0      | 0      |
| 0      | 1      | 0      | 0      | 0      | 1      | 2      |
| 2      | 2      | 2      | 0      | 2      | 1      | 0      |
| 2      | 2      | 2      | 0      | 0      | 0      | 0      |
| 2      | 2      | 2      | 2      | 0      | 0      | 2      |
| 3      | 2      | 0      | 0      | 0      | 2      | 2      |
| 2      | 2      | 1      | 1      | 0      | 2      | 0      |
| 2      | 2      | 2      | 0      | 1      | 0      | 2      |
| 2      | 0      | 0      | 1      | 1      | 0      | 0      |
| 4      | 1      | 3      | 0      | 0      | 1      | 0      |
| 3      | 1      | 3      | 0      | 0      | 0      | 0      |
| 2      | 2      | 2      | 2      | 0      | 2      | 0      |
| 2      | 2      | 0      | 0      | 2      | 1      | 2      |
| 0      | 1      | 2      | 0      | 0      | 2      | 2      |
| 2      | 2      | 2      | 2      | 0      | 1      | 0      |
| 2      | 0      | 0      | 0      | 0      | 3      | 2      |
| 0      | 2      | 0      | 0      | 0      | 0      | 0      |
| 2      | 2      | 0      | 2      | 0      | 1      | 0      |
| 2      | 2      | 0      | 2      | 0      | 0      | 0      |
| 2      | 2      | 2      | 2      | 0      | 1      | 0      |
| 3      | 2      | 0      | 0      | 0      | 0      | 1      |
| 1      | 0      | 2      | 0      | 0      | 0      | 1      |
| 2      | 2      | 1      | 0      | 0      | 0      | 0      |
| 2      | 2      | 2      | 1      | 0      | 2      | 0      |
| 2      | 2      | 2      | 1      | 0      | 0      | 0      |
| 2      | 0      | 2      | 0      | 1      | 2      | 1      |
| 0      | 2      | 2      | 0      | 0      | 0      | 0      |
| 3      | 0      | 3      | 0      | 0      | 0      | 0      |
| 3      | 1      | 1      | 2      | 0      | 1      | 1      |
| 1      | 0      | 1      | 2      | 1      | 1      | 2      |
| 2      | 2      | 2      | 2      | 1      | 0      | 0      |
| 0      | 2      | 2      | 3      | 0      | 0      | 2      |
| 0      | 0      | 2      | 0      | 0      | 2      | 0      |
| 1      | 2      | 0      | 0      | 0      | 0      | 0      |
| 3      | 2      | 3      | 2      | 2      | 0      | 0      |
| 2      | 2      | 2      | 0      | 0      | 0      | 0      |
| 2      | 2      | 0      | 0      | 0      | 0      | 0      |
| 3      | 2      | 0      | 3      | 2      | 0      | 0      |
| 2      | 0      | 0      | 3      | 0      | 2      | 0      |
| 3      | 1      | 0      | 1      | 0      | 0      | 0      |
| 4      | 0      | 2      | 0      | 0      | 0      | 0      |
| 0      | 0      | 0      | 2      | 0      | 1      | 0      |
| 0      | 1      | 0      | 2      | 0      | 2      | 0      |
| 0      | 1      | 0      | 1      | 0      | 0      | 0      |
| 1      | 2      | 0      | 2      | 0      | 2      | 0      |
| 0      | 2      | 0      | 0      | 2      | 1      | 2      |
| 2      | 1      | 2      | 0      | 1      | 0      | 0      |

|   |   |   |   |   |   |   |
|---|---|---|---|---|---|---|
| 0 | 1 | 0 | 0 | 0 | 1 | 1 |
| 2 | 2 | 0 | 0 | 2 | 0 | 0 |
| 2 | 2 | 2 | 0 | 0 | 2 | 0 |
| 2 | 0 | 0 | 2 | 0 | 0 | 0 |
| 2 | 2 | 0 | 0 | 0 | 0 | 2 |
| 2 | 2 | 0 | 2 | 0 | 0 | 0 |
| 0 | 2 | 0 | 2 | 0 | 0 | 0 |
| 2 | 2 | 0 | 0 | 2 | 0 | 0 |
| 0 | 0 | 0 | 0 | 0 | 0 | 0 |
| 0 | 2 | 2 | 0 | 0 | 0 | 1 |
| 3 | 0 | 0 | 0 | 0 | 0 | 0 |
| 2 | 0 | 2 | 2 | 0 | 0 | 0 |
| 2 | 1 | 3 | 0 | 0 | 1 | 0 |
| 2 | 2 | 2 | 0 | 1 | 0 | 1 |
| 0 | 2 | 0 | 0 | 0 | 1 | 0 |
| 0 | 0 | 0 | 0 | 2 | 0 | 0 |
| 0 | 0 | 0 | 0 | 2 | 2 | 0 |
| 2 | 0 | 2 | 2 | 0 | 2 | 1 |
| 0 | 1 | 0 | 0 | 0 | 2 | 2 |
| 0 | 0 | 0 | 0 | 1 | 0 | 0 |
| 3 | 2 | 0 | 0 | 0 | 1 | 1 |
| 3 | 2 | 2 | 2 | 0 | 0 | 0 |
| 2 | 2 | 2 | 2 | 1 | 0 | 1 |
| 2 | 2 | 2 | 0 | 0 | 2 | 0 |
| 2 | 1 | 3 | 2 | 0 | 1 | 0 |
| 2 | 2 | 2 | 0 | 1 | 0 | 0 |
| 2 | 2 | 2 | 0 | 0 | 2 | 4 |
| 0 | 2 | 0 | 2 | 0 | 0 | 1 |
| 2 | 2 | 0 | 0 | 0 | 0 | 1 |
| 3 | 2 | 2 | 0 | 0 | 1 | 2 |
| 2 | 0 | 0 | 0 | 0 | 2 | 0 |
| 2 | 2 | 0 | 0 | 0 | 0 | 0 |
| 2 | 2 | 0 | 0 | 0 | 2 | 0 |
| 0 | 2 | 0 | 0 | 0 | 0 | 1 |
| 2 | 0 | 2 | 2 | 0 | 0 | 0 |
| 2 | 2 | 2 | 0 | 0 | 0 | 0 |
| 2 | 2 | 2 | 0 | 0 | 1 | 1 |
| 2 | 0 | 1 | 0 | 1 | 1 | 0 |
| 3 | 0 | 0 | 0 | 0 | 2 | 0 |
| 0 | 2 | 1 | 0 | 2 | 1 | 0 |
| 0 | 0 | 2 | 0 | 0 | 2 | 0 |
| 2 | 0 | 0 | 0 | 0 | 1 | 0 |
| 3 | 2 | 0 | 0 | 0 | 2 | 0 |
| 2 | 0 | 0 | 0 | 1 | 0 | 0 |
| 2 | 2 | 0 | 0 | 0 | 0 | 0 |
| 0 | 0 | 2 | 0 | 0 | 2 | 2 |
| 2 | 2 | 2 | 0 | 2 | 0 | 0 |
| 3 | 1 | 2 | 1 | 0 | 0 | 0 |
| 3 | 3 | 0 | 2 | 0 | 0 | 0 |
| 2 | 2 | 2 | 0 | 0 | 0 | 2 |
| 2 | 2 | 0 | 0 | 1 | 2 | 1 |
| 2 | 2 | 0 | 0 | 1 | 0 | 2 |
| 2 | 0 | 2 | 1 | 0 | 0 | 2 |
| 2 | 2 | 3 | 3 | 0 | 1 | 0 |
| 2 | 2 | 2 | 2 | 1 | 0 | 0 |
| 0 | 0 | 2 | 0 | 0 | 0 | 0 |



|   |   |   |   |   |   |   |
|---|---|---|---|---|---|---|
| 2 | 0 | 2 | 0 | 0 | 0 | 0 |
| 2 | 0 | 0 | 0 | 0 | 2 | 0 |
| 2 | 0 | 3 | 0 | 0 | 3 | 0 |
| 1 | 1 | 0 | 0 | 0 | 3 | 0 |
| 2 | 2 | 2 | 0 | 0 | 0 | 0 |
| 2 | 2 | 0 | 0 | 1 | 0 | 1 |
| 2 | 2 | 0 | 2 | 0 | 0 | 0 |
| 2 | 2 | 2 | 2 | 0 | 1 | 1 |
| 2 | 2 | 2 | 2 | 0 | 0 | 1 |
| 3 | 0 | 0 | 2 | 0 | 0 | 3 |
| 4 | 0 | 0 | 0 | 0 | 2 | 0 |
| 2 | 2 | 2 | 0 | 0 | 2 | 0 |
| 2 | 0 | 2 | 0 | 0 | 2 | 2 |
| 2 | 2 | 2 | 1 | 0 | 2 | 0 |
| 3 | 2 | 2 | 0 | 0 | 1 | 0 |
| 2 | 2 | 2 | 3 | 0 | 0 | 0 |
| 2 | 0 | 0 | 0 | 1 | 2 | 0 |
| 2 | 2 | 0 | 0 | 0 | 0 | 1 |
| 2 | 2 | 0 | 0 | 0 | 0 | 0 |
| 0 | 0 | 0 | 0 | 0 | 2 | 0 |
| 2 | 2 | 0 | 1 | 1 | 2 | 0 |
| 0 | 2 | 0 | 0 | 0 | 0 | 0 |
| 2 | 0 | 0 | 0 | 0 | 2 | 0 |
| 0 | 2 | 0 | 2 | 0 | 2 | 0 |
| 2 | 2 | 1 | 2 | 0 | 0 | 0 |
| 2 | 2 | 0 | 0 | 0 | 1 | 0 |
| 2 | 0 | 0 | 0 | 2 | 0 | 2 |
| 2 | 2 | 0 | 2 | 0 | 2 | 0 |
| 2 | 0 | 0 | 0 | 3 | 2 | 0 |
| 2 | 0 | 0 | 0 | 0 | 0 | 0 |
| 0 | 0 | 0 | 0 | 0 | 0 | 0 |
| 0 | 0 | 0 | 2 | 0 | 0 | 0 |
| 2 | 2 | 1 | 0 | 1 | 1 | 0 |
| 0 | 2 | 1 | 0 | 2 | 0 | 2 |
| 2 | 2 | 2 | 0 | 0 | 2 | 0 |
| 2 | 0 | 0 | 4 | 0 | 2 | 0 |
| 2 | 0 | 2 | 0 | 2 | 2 | 0 |
| 0 | 0 | 0 | 0 | 0 | 0 | 0 |
| 3 | 0 | 2 | 3 | 0 | 2 | 0 |
| 2 | 0 | 0 | 0 | 0 | 0 | 0 |
| 2 | 2 | 2 | 0 | 0 | 2 | 2 |
| 2 | 0 | 0 | 0 | 0 | 0 | 3 |
| 4 | 2 | 0 | 0 | 0 | 0 | 1 |
| 3 | 2 | 2 | 0 | 0 | 1 | 0 |
| 2 | 2 | 2 | 0 | 0 | 1 | 0 |
| 2 | 2 | 2 | 3 | 0 | 0 | 0 |
| 0 | 0 | 0 | 0 | 0 | 1 | 2 |
| 2 | 2 | 2 | 2 | 0 | 2 | 0 |
| 2 | 0 | 0 | 0 | 0 | 2 | 3 |
| 2 | 2 | 0 | 2 | 0 | 2 | 0 |
| 1 | 0 | 0 | 0 | 0 | 0 | 0 |
| 2 | 2 | 0 | 0 | 0 | 0 | 0 |
| 3 | 2 | 1 | 0 | 0 | 0 | 0 |
| 3 | 0 | 2 | 0 | 0 | 0 | 0 |
| 0 | 2 | 0 | 0 | 0 | 3 | 0 |
| 2 | 2 | 1 | 0 | 0 | 0 | 0 |

|   |   |   |   |   |   |   |
|---|---|---|---|---|---|---|
| 1 | 2 | 1 | 2 | 4 | 1 | 0 |
| 2 | 2 | 0 | 0 | 0 | 0 | 1 |
| 2 | 2 | 0 | 0 | 0 | 2 | 1 |
| 2 | 2 | 2 | 0 | 0 | 0 | 3 |
| 0 | 0 | 0 | 2 | 0 | 0 | 0 |
| 2 | 0 | 0 | 0 | 2 | 0 | 0 |
| 2 | 2 | 2 | 0 | 0 | 2 | 1 |
| 2 | 0 | 0 | 0 | 0 | 0 | 0 |
| 0 | 2 | 1 | 0 | 0 | 0 | 0 |
| 2 | 2 | 2 | 0 | 0 | 0 | 0 |
| 0 | 2 | 0 | 2 | 0 | 0 | 0 |
| 4 | 2 | 2 | 0 | 0 | 2 | 0 |
| 0 | 0 | 0 | 0 | 0 | 0 | 0 |
| 0 | 0 | 0 | 0 | 0 | 0 | 0 |
| 3 | 2 | 3 | 0 | 0 | 0 | 0 |
| 2 | 2 | 3 | 0 | 0 | 0 | 0 |
| 2 | 1 | 2 | 3 | 0 | 0 | 2 |
| 1 | 2 | 2 | 2 | 1 | 0 | 0 |
| 2 | 2 | 2 | 0 | 0 | 2 | 0 |
| 2 | 0 | 0 | 0 | 1 | 0 | 1 |
| 0 | 0 | 0 | 0 | 0 | 0 | 0 |
| 0 | 2 | 2 | 2 | 0 | 0 | 0 |
| 1 | 2 | 1 | 1 | 1 | 0 | 0 |
| 0 | 0 | 0 | 0 | 2 | 0 | 0 |
| 2 | 2 | 2 | 0 | 1 | 0 | 0 |
| 1 | 1 | 1 | 2 | 0 | 2 | 1 |
| 2 | 1 | 2 | 2 | 2 | 1 | 1 |
| 2 | 2 | 2 | 1 | 1 | 0 | 0 |
| 1 | 0 | 1 | 1 | 3 | 1 | 1 |
| 0 | 2 | 2 | 0 | 1 | 0 | 0 |
| 0 | 2 | 0 | 0 | 0 | 0 | 0 |
| 3 | 0 | 0 | 0 | 0 | 0 | 2 |
| 2 | 2 | 0 | 0 | 0 | 2 | 0 |
| 2 | 2 | 2 | 1 | 0 | 0 | 0 |
| 0 | 2 | 0 | 3 | 0 | 2 | 0 |
| 2 | 0 | 0 | 3 | 0 | 0 | 1 |
| 2 | 0 | 0 | 0 | 0 | 2 | 0 |
| 0 | 0 | 0 | 0 | 0 | 0 | 0 |
| 2 | 2 | 0 | 0 | 0 | 0 | 0 |
| 2 | 2 | 0 | 0 | 0 | 2 | 2 |
| 2 | 2 | 0 | 2 | 0 | 0 | 0 |
| 0 | 0 | 0 | 0 | 0 | 0 | 0 |
| 1 | 2 | 2 | 0 | 0 | 0 | 0 |
| 2 | 0 | 2 | 0 | 0 | 0 | 1 |
| 2 | 2 | 2 | 0 | 0 | 1 | 0 |
| 1 | 0 | 0 | 2 | 2 | 1 | 0 |
| 2 | 2 | 1 | 0 | 0 | 0 | 0 |
| 0 | 2 | 0 | 0 | 0 | 2 | 0 |
| 3 | 2 | 0 | 0 | 0 | 0 | 0 |
| 2 | 1 | 0 | 0 | 0 | 2 | 0 |
| 2 | 1 | 0 | 0 | 2 | 0 | 0 |
| 2 | 2 | 0 | 0 | 0 | 2 | 0 |
| 4 | 2 | 3 | 0 | 0 | 0 | 0 |
| 2 | 2 | 2 | 0 | 0 | 0 | 0 |
| 2 | 2 | 4 | 2 | 0 | 0 | 0 |
| 2 | 2 | 3 | 0 | 0 | 0 | 2 |

|   |   |   |   |   |   |   |
|---|---|---|---|---|---|---|
| 3 | 2 | 0 | 0 | 2 | 1 | 1 |
| 2 | 0 | 1 | 0 | 2 | 1 | 0 |
| 2 | 2 | 2 | 0 | 0 | 0 | 0 |
| 3 | 2 | 3 | 2 | 1 | 0 | 0 |
| 2 | 2 | 1 | 0 | 0 | 0 | 0 |
| 2 | 0 | 2 | 0 | 0 | 0 | 0 |
| 0 | 2 | 1 | 0 | 0 | 2 | 0 |
| 2 | 2 | 2 | 0 | 0 | 0 | 0 |
| 2 | 2 | 2 | 4 | 0 | 2 | 0 |
| 2 | 3 | 4 | 0 | 0 | 0 | 3 |
| 2 | 3 | 0 | 0 | 1 | 0 | 0 |
| 2 | 2 | 2 | 0 | 0 | 2 | 1 |
| 0 | 0 | 2 | 0 | 0 | 1 | 0 |
| 2 | 2 | 2 | 0 | 0 | 0 | 1 |
| 0 | 2 | 2 | 2 | 2 | 0 | 2 |
| 2 | 0 | 2 | 3 | 1 | 2 | 0 |
| 2 | 2 | 1 | 3 | 1 | 2 | 3 |
| 0 | 3 | 0 | 0 | 3 | 1 | 0 |
| 2 | 2 | 0 | 0 | 0 | 0 | 0 |
| 2 | 4 | 1 | 0 | 2 | 1 | 1 |
| 3 | 2 | 0 | 0 | 0 | 3 | 3 |
| 2 | 2 | 2 | 1 | 0 | 2 | 2 |
| 0 | 2 | 0 | 0 | 0 | 0 | 0 |
| 2 | 2 | 2 | 0 | 0 | 2 | 0 |
| 2 | 2 | 0 | 0 | 0 | 0 | 0 |
| 2 | 2 | 3 | 2 | 0 | 1 | 0 |
| 3 | 4 | 1 | 0 | 2 | 0 | 0 |
| 3 | 2 | 2 | 2 | 2 | 0 | 0 |
| 2 | 0 | 0 | 0 | 0 | 0 | 0 |
| 2 | 2 | 0 | 2 | 0 | 0 | 0 |
| 3 | 2 | 2 | 0 | 1 | 0 | 1 |
| 0 | 1 | 0 | 0 | 0 | 3 | 0 |
| 1 | 1 | 1 | 2 | 0 | 0 | 1 |
| 2 | 2 | 3 | 0 | 0 | 1 | 2 |
| 1 | 2 | 2 | 0 | 1 | 0 | 0 |
| 2 | 0 | 2 | 0 | 1 | 0 | 1 |
| 0 | 2 | 0 | 0 | 1 | 0 | 1 |
| 0 | 0 | 2 | 0 | 0 | 3 | 0 |
| 1 | 1 | 1 | 1 | 0 | 1 | 0 |
| 2 | 2 | 0 | 0 | 1 | 0 | 0 |
| 2 | 2 | 0 | 2 | 0 | 2 | 0 |
| 3 | 2 | 0 | 0 | 0 | 1 | 1 |
| 2 | 2 | 2 | 3 | 0 | 0 | 0 |
| 0 | 2 | 0 | 0 | 0 | 0 | 0 |
| 2 | 2 | 1 | 2 | 0 | 2 | 2 |
| 2 | 0 | 0 | 1 | 0 | 0 | 0 |
| 2 | 2 | 2 | 0 | 0 | 0 | 0 |
| 1 | 0 | 3 | 0 | 2 | 2 | 0 |
| 2 | 1 | 2 | 0 | 2 | 0 | 2 |
| 0 | 0 | 0 | 0 | 2 | 1 | 0 |
| 2 | 2 | 3 | 2 | 0 | 1 | 1 |
| 2 | 0 | 0 | 0 | 0 | 0 | 0 |
| 2 | 2 | 1 | 0 | 0 | 0 | 0 |
| 3 | 1 | 1 | 2 | 1 | 0 | 0 |
| 1 | 1 | 0 | 0 | 1 | 0 | 1 |
| 2 | 0 | 2 | 0 | 0 | 1 | 0 |

|   |   |   |   |   |   |   |
|---|---|---|---|---|---|---|
| 0 | 2 | 0 | 0 | 2 | 0 | 0 |
| 2 | 2 | 0 | 0 | 0 | 0 | 2 |
| 2 | 2 | 0 | 0 | 0 | 1 | 0 |

| CIRS_H | CIRS_I | CIRS_J | CIRS_K | CIRS_L | CIRS_M |
|--------|--------|--------|--------|--------|--------|
| 0      | 0      | 1      | 0      | 0      | 0      |
| 0      | 0      | 0      | 0      | 0      | 0      |
| 0      | 0      | 0      | 0      | 0      | 0      |
| 4      | 0      | 0      | 1      | 0      | 0      |
| 0      | 2      | 0      | 2      | 2      | 0      |
| 0      | 0      | 0      | 1      | 0      | 0      |
| 0      | 0      | 0      | 0      | 0      | 0      |
| 0      | 2      | 2      | 0      | 0      | 1      |
| 0      | 0      | 0      | 0      | 2      | 2      |
| 0      | 0      | 0      | 0      | 0      | 0      |
| 0      | 1      | 2      | 0      | 0      | 0      |
| 0      | 2      | 0      | 2      | 0      | 2      |
| 0      | 1      | 0      | 0      | 2      | 0      |
| 0      | 3      | 0      | 1      | 0      | 0      |
| 0      | 1      | 2      | 0      | 0      | 0      |
| 0      | 0      | 0      | 0      | 0      | 0      |
| 0      | 2      | 0      | 0      | 0      | 0      |
| 1      | 0      | 0      | 2      | 0      | 1      |
| 0      | 0      | 1      | 3      | 0      | 0      |
| 0      | 0      | 0      | 0      | 0      | 0      |
| 3      | 0      | 2      | 0      | 0      | 1      |
| 0      | 1      | 3      | 0      | 3      | 0      |
| 0      | 3      | 0      | 3      | 0      | 0      |
| 0      | 0      | 0      | 2      | 0      | 0      |
| 0      | 0      | 0      | 0      | 2      | 0      |
| 0      | 0      | 0      | 2      | 0      | 2      |
| 0      | 0      | 0      | 0      | 1      | 0      |
| 0      | 0      | 1      | 0      | 0      | 0      |
| 0      | 2      | 0      | 0      | 0      | 0      |
| 0      | 0      | 0      | 0      | 1      | 0      |
| 0      | 2      | 0      | 0      | 0      | 0      |
| 1      | 0      | 0      | 0      | 2      | 2      |
| 0      | 1      | 0      | 0      | 2      | 2      |
| 0      | 2      | 2      | 0      | 2      | 0      |
| 1      | 0      | 0      | 1      | 0      | 0      |
| 0      | 0      | 0      | 0      | 2      | 2      |
| 0      | 1      | 0      | 1      | 1      | 0      |
| 0      | 3      | 0      | 0      | 1      | 3      |
| 0      | 0      | 0      | 0      | 0      | 2      |
| 0      | 0      | 1      | 3      | 4      | 2      |
| 0      | 0      | 0      | 0      | 0      | 0      |
| 0      | 1      | 0      | 0      | 0      | 0      |
| 0      | 0      | 0      | 0      | 0      | 2      |
| 0      | 1      | 0      | 2      | 0      | 0      |
| 0      | 0      | 2      | 0      | 0      | 2      |
| 0      | 1      | 0      | 0      | 0      | 0      |
| 0      | 2      | 0      | 0      | 0      | 2      |
| 0      | 1      | 0      | 0      | 0      | 0      |
| 2      | 0      | 0      | 2      | 2      | 0      |
| 0      | 2      | 1      | 0      | 0      | 1      |
| 0      | 0      | 0      | 0      | 0      | 2      |
| 0      | 3      | 0      | 0      | 0      | 2      |
| 0      | 0      | 2      | 0      | 0      | 2      |

|   |   |   |   |   |   |
|---|---|---|---|---|---|
| 1 | 1 | 0 | 0 | 0 | 0 |
| 2 | 0 | 0 | 1 | 0 | 2 |
| 0 | 0 | 2 | 0 | 2 | 0 |
| 0 | 0 | 2 | 0 | 0 | 0 |
| 0 | 2 | 0 | 0 | 0 | 2 |
| 0 | 1 | 0 | 0 | 2 | 0 |
| 0 | 0 | 0 | 0 | 0 | 0 |
| 0 | 0 | 0 | 1 | 0 | 2 |
| 0 | 0 | 1 | 0 | 2 | 3 |
| 0 | 0 | 0 | 0 | 2 | 2 |
| 0 | 0 | 0 | 2 | 0 | 0 |
| 0 | 0 | 0 | 1 | 0 | 1 |
| 0 | 0 | 0 | 0 | 0 | 0 |
| 0 | 0 | 0 | 0 | 3 | 0 |
| 0 | 2 | 0 | 0 | 0 | 2 |
| 0 | 0 | 0 | 2 | 0 | 0 |
| 0 | 0 | 0 | 1 | 0 | 0 |
| 0 | 1 | 1 | 2 | 0 | 0 |
| 0 | 0 | 0 | 0 | 2 | 0 |
| 0 | 0 | 0 | 2 | 0 | 0 |
| 0 | 0 | 0 | 0 | 0 | 2 |
| 0 | 2 | 0 | 0 | 2 | 0 |
| 0 | 1 | 2 | 2 | 0 | 3 |
| 3 | 0 | 2 | 1 | 0 | 0 |
| 0 | 0 | 1 | 0 | 0 | 0 |
| 0 | 0 | 0 | 1 | 0 | 0 |
| 0 | 1 | 0 | 0 | 0 | 0 |
| 0 | 0 | 3 | 0 | 0 | 0 |
| 0 | 1 | 2 | 1 | 0 | 2 |
| 0 | 0 | 0 | 0 | 2 | 0 |
| 0 | 0 | 2 | 0 | 0 | 0 |
| 0 | 2 | 1 | 2 | 2 | 2 |
| 2 | 0 | 2 | 1 | 2 | 0 |
| 0 | 0 | 0 | 2 | 0 | 0 |
| 0 | 0 | 0 | 0 | 0 | 0 |
| 0 | 1 | 1 | 0 | 2 | 0 |
| 2 | 0 | 0 | 2 | 1 | 0 |
| 0 | 1 | 0 | 0 | 0 | 2 |
| 0 | 2 | 2 | 0 | 0 | 2 |
| 0 | 0 | 0 | 0 | 2 | 1 |
| 0 | 3 | 3 | 0 | 0 | 2 |
| 0 | 1 | 0 | 0 | 3 | 0 |
| 2 | 2 | 0 | 0 | 0 | 0 |
| 0 | 3 | 1 | 2 | 0 | 1 |
| 0 | 1 | 0 | 1 | 0 | 2 |
| 0 | 0 | 0 | 1 | 0 | 0 |
| 0 | 1 | 0 | 2 | 0 | 2 |
| 0 | 0 | 2 | 0 | 0 | 2 |
| 0 | 0 | 0 | 0 | 1 | 0 |
| 0 | 0 | 0 | 2 | 0 | 0 |
| 0 | 1 | 0 | 0 | 2 | 0 |
| 0 | 0 | 0 | 0 | 0 | 0 |
| 0 | 0 | 0 | 1 | 0 | 0 |
| 1 | 0 | 0 | 0 | 0 | 0 |
| 0 | 1 | 1 | 1 | 1 | 1 |
| 0 | 2 | 0 | 0 | 0 | 0 |

|   |   |   |   |   |   |
|---|---|---|---|---|---|
| 0 | 0 | 0 | 2 | 0 | 0 |
| 0 | 0 | 2 | 0 | 2 | 2 |
| 0 | 0 | 2 | 1 | 2 | 0 |
| 0 | 0 | 2 | 0 | 0 | 0 |
| 0 | 2 | 2 | 0 | 0 | 0 |
| 0 | 0 | 0 | 1 | 0 | 0 |
| 0 | 0 | 0 | 0 | 0 | 0 |
| 2 | 0 | 0 | 2 | 0 | 2 |
| 0 | 0 | 0 | 1 | 0 | 2 |
| 0 | 0 | 0 | 2 | 1 | 2 |
| 0 | 2 | 0 | 0 | 0 | 0 |
| 0 | 2 | 2 | 0 | 0 | 0 |
| 0 | 1 | 1 | 3 | 1 | 0 |
| 0 | 1 | 2 | 0 | 2 | 1 |
| 0 | 2 | 0 | 1 | 0 | 0 |
| 0 | 1 | 1 | 0 | 0 | 0 |
| 0 | 2 | 1 | 1 | 0 | 0 |
| 0 | 0 | 0 | 0 | 0 | 0 |
| 0 | 0 | 0 | 0 | 0 | 0 |
| 0 | 0 | 0 | 2 | 2 | 0 |
| 0 | 0 | 0 | 0 | 0 | 0 |
| 0 | 0 | 0 | 2 | 0 | 0 |
| 0 | 0 | 0 | 0 | 0 | 0 |
| 0 | 0 | 1 | 2 | 0 | 2 |
| 0 | 0 | 1 | 2 | 0 | 0 |
| 0 | 0 | 1 | 1 | 0 | 0 |
| 0 | 0 | 0 | 0 | 0 | 0 |
| 0 | 0 | 1 | 2 | 0 | 2 |
| 0 | 0 | 0 | 0 | 0 | 0 |
| 0 | 2 | 0 | 2 | 0 | 1 |
| 0 | 0 | 0 | 2 | 2 | 0 |
| 0 | 0 | 0 | 0 | 0 | 0 |
| 0 | 0 | 0 | 0 | 0 | 0 |
| 0 | 0 | 0 | 0 | 0 | 1 |
| 0 | 0 | 0 | 0 | 1 | 2 |
| 2 | 2 | 0 | 0 | 0 | 0 |
| 0 | 0 | 0 | 0 | 0 | 0 |
| 0 | 0 | 0 | 0 | 0 | 0 |
| 0 | 0 | 0 | 0 | 0 | 0 |
| 0 | 0 | 1 | 2 | 0 | 0 |
| 1 | 0 | 0 | 0 | 1 | 2 |
| 0 | 0 | 0 | 1 | 0 | 0 |
| 0 | 2 | 0 | 2 | 0 | 0 |
| 0 | 2 | 1 | 1 | 2 | 2 |
| 0 | 2 | 0 | 2 | 0 | 0 |
| 0 | 2 | 2 | 0 | 0 | 2 |
| 0 | 0 | 2 | 0 | 2 | 0 |
| 0 | 1 | 0 | 0 | 0 | 0 |
| 0 | 0 | 0 | 0 | 0 | 2 |
| 0 | 0 | 2 | 0 | 2 | 0 |
| 0 | 0 | 0 | 0 | 0 | 2 |
| 0 | 0 | 2 | 3 | 1 | 2 |
| 0 | 1 | 2 | 2 | 0 | 1 |
| 1 | 0 | 0 | 0 | 0 | 0 |
| 0 | 0 | 0 | 2 | 0 | 0 |
| 0 | 0 | 0 | 2 | 1 | 0 |

|   |   |   |   |   |   |
|---|---|---|---|---|---|
| 0 | 3 | 1 | 0 | 4 | 0 |
| 0 | 0 | 0 | 2 | 0 | 0 |
| 0 | 2 | 0 | 0 | 0 | 0 |
| 0 | 0 | 0 | 0 | 0 | 0 |
| 0 | 0 | 0 | 0 | 0 | 0 |
| 0 | 0 | 0 | 3 | 0 | 0 |
| 0 | 2 | 0 | 0 | 0 | 2 |
| 0 | 0 | 0 | 0 | 1 | 0 |
| 0 | 0 | 0 | 2 | 0 | 0 |
| 0 | 0 | 0 | 0 | 0 | 0 |
| 0 | 0 | 1 | 2 | 0 | 2 |
| 0 | 0 | 0 | 1 | 0 | 0 |
| 0 | 0 | 0 | 0 | 0 | 0 |
| 0 | 0 | 0 | 0 | 0 | 0 |
| 0 | 3 | 1 | 2 | 0 | 2 |
| 0 | 0 | 2 | 0 | 0 | 0 |
| 1 | 2 | 2 | 0 | 0 | 1 |
| 0 | 0 | 0 | 0 | 0 | 2 |
| 0 | 0 | 0 | 1 | 0 | 0 |
| 0 | 0 | 1 | 2 | 0 | 0 |
| 0 | 0 | 0 | 0 | 0 | 0 |
| 0 | 0 | 0 | 0 | 2 | 0 |
| 0 | 3 | 1 | 1 | 3 | 0 |
| 0 | 0 | 0 | 0 | 0 | 0 |
| 0 | 1 | 0 | 0 | 0 | 2 |
| 0 | 0 | 1 | 0 | 0 | 2 |
| 0 | 2 | 1 | 0 | 0 | 0 |
| 1 | 1 | 0 | 0 | 1 | 0 |
| 0 | 1 | 1 | 0 | 3 | 0 |
| 0 | 0 | 2 | 2 | 0 | 2 |
| 0 | 0 | 0 | 2 | 2 | 0 |
| 0 | 0 | 1 | 0 | 2 | 0 |
| 0 | 2 | 0 | 0 | 0 | 0 |
| 0 | 0 | 1 | 0 | 0 | 0 |
| 0 | 0 | 0 | 0 | 1 | 2 |
| 1 | 0 | 0 | 0 | 0 | 0 |
| 0 | 0 | 0 | 2 | 0 | 0 |
| 0 | 0 | 0 | 0 | 2 | 2 |
| 1 | 0 | 2 | 0 | 2 | 0 |
| 1 | 0 | 0 | 1 | 0 | 0 |
| 0 | 0 | 1 | 1 | 1 | 2 |
| 0 | 0 | 0 | 0 | 0 | 0 |
| 0 | 0 | 0 | 0 | 0 | 0 |
| 0 | 1 | 0 | 2 | 0 | 0 |
| 0 | 1 | 1 | 0 | 2 | 0 |
| 0 | 0 | 0 | 2 | 2 | 2 |
| 0 | 0 | 0 | 2 | 2 | 0 |
| 0 | 0 | 0 | 2 | 0 | 0 |
| 0 | 0 | 1 | 2 | 0 | 2 |
| 1 | 0 | 1 | 1 | 0 | 0 |
| 0 | 0 | 0 | 2 | 0 | 2 |
| 0 | 0 | 0 | 2 | 1 | 0 |
| 0 | 3 | 1 | 0 | 1 | 0 |
| 0 | 1 | 1 | 2 | 3 | 0 |
| 0 | 0 | 0 | 0 | 1 | 2 |
| 0 | 2 | 0 | 3 | 1 | 1 |



|   |   |   |   |   |   |
|---|---|---|---|---|---|
| 0 | 0 | 1 | 1 | 2 | 1 |
| 0 | 0 | 0 | 1 | 0 | 0 |
| 0 | 0 | 0 | 1 | 2 | 0 |
| 0 | 3 | 0 | 1 | 1 | 0 |
| 0 | 1 | 2 | 0 | 0 | 0 |
| 0 | 0 | 0 | 2 | 0 | 0 |
| 1 | 0 | 0 | 2 | 2 | 0 |
| 0 | 0 | 0 | 2 | 1 | 0 |
| 0 | 2 | 0 | 0 | 2 | 3 |
| 0 | 1 | 0 | 0 | 0 | 0 |
| 0 | 1 | 0 | 2 | 0 | 3 |
| 0 | 1 | 0 | 2 | 2 | 0 |
| 0 | 1 | 1 | 2 | 1 | 2 |
| 0 | 0 | 0 | 0 | 2 | 0 |
| 0 | 0 | 2 | 0 | 0 | 1 |
| 0 | 0 | 2 | 0 | 0 | 2 |
| 0 | 1 | 1 | 3 | 0 | 2 |
| 0 | 1 | 0 | 0 | 0 | 2 |
| 0 | 0 | 0 | 3 | 0 | 2 |
| 0 | 0 | 0 | 0 | 4 | 0 |
| 0 | 0 | 0 | 0 | 1 | 1 |
| 0 | 0 | 0 | 0 | 0 | 2 |
| 0 | 0 | 0 | 2 | 0 | 2 |
| 0 | 0 | 0 | 1 | 2 | 0 |
| 0 | 1 | 0 | 3 | 0 | 2 |
| 1 | 3 | 0 | 0 | 0 | 0 |
| 0 | 1 | 0 | 3 | 0 | 0 |
| 0 | 0 | 0 | 1 | 2 | 0 |
| 0 | 2 | 1 | 0 | 2 | 0 |
| 0 | 0 | 0 | 2 | 0 | 2 |
| 0 | 2 | 0 | 2 | 0 | 1 |
| 0 | 0 | 0 | 1 | 2 | 0 |
| 0 | 0 | 2 | 3 | 2 | 1 |
| 0 | 1 | 1 | 1 | 0 | 2 |
| 0 | 3 | 1 | 2 | 3 | 1 |
| 0 | 0 | 0 | 2 | 0 | 3 |
| 0 | 0 | 2 | 0 | 2 | 2 |
| 0 | 0 | 1 | 1 | 0 | 0 |
| 0 | 0 | 0 | 0 | 0 | 0 |
| 0 | 0 | 1 | 2 | 0 | 0 |
| 0 | 2 | 0 | 2 | 0 | 0 |
| 0 | 0 | 1 | 0 | 0 | 0 |
| 0 | 2 | 0 | 1 | 0 | 2 |
| 0 | 0 | 2 | 2 | 0 | 1 |
| 0 | 0 | 2 | 0 | 0 | 0 |
| 0 | 0 | 0 | 0 | 0 | 2 |
| 0 | 3 | 1 | 0 | 1 | 2 |
| 3 | 1 | 0 | 0 | 0 | 2 |
| 0 | 0 | 0 | 1 | 2 | 0 |
| 0 | 0 | 0 | 1 | 0 | 0 |
| 0 | 0 | 0 | 0 | 2 | 0 |
| 0 | 0 | 0 | 2 | 0 | 2 |
| 3 | 1 | 0 | 3 | 2 | 3 |
| 1 | 0 | 1 | 0 | 0 | 0 |
| 0 | 1 | 0 | 2 | 2 | 0 |
| 0 | 0 | 0 | 2 | 0 | 0 |

|   |   |   |   |   |   |
|---|---|---|---|---|---|
| 1 | 0 | 1 | 2 | 0 | 0 |
| 0 | 0 | 1 | 0 | 1 | 3 |
| 0 | 0 | 0 | 2 | 2 | 0 |

| CIRS_N | CIRS-Total | Hb   | ClairCréat |
|--------|------------|------|------------|
| 2      | 10         | 9,2  | 41,0       |
| 2      | 7          | 10,3 | 32,0       |
| 2      | 10         | 8,7  | 43,0       |
| 0      | 13         | 10,9 | 40,0       |
| 3      | 12         | 10,8 | 36,0       |
| 0      | 11         | 10,7 | 29,0       |
| 2      | 4          | 11,4 | 33,0       |
| 2      | 11         | 9,5  | 11,0       |
| 0      | 13         | 11,9 | 42,7       |
| 2      | 8          | 13,5 | 53,0       |
| 2      | 15         | 12,1 | 37,0       |
| 3      | 18         | 11,8 | 35,0       |
| 1      | 12         | 11,8 | 25,0       |
| 1      | 14         | 10,9 | 14,0       |
| 1      | 8          | 14,1 | 79,0       |
| 0      | 9          | 11,7 | 33,0       |
| 2      | 11         | 12,2 | 24,0       |
| 1      | 15         | 10,9 | 23,0       |
| 1      | 14         | 10,0 | 77,0       |
| 0      | 7          | 12,4 | 19,0       |
| 3      | 18         | 10,6 |            |
| 0      | 14         | 9,5  | 36,0       |
| 0      | 8          | 8,5  | 5,0        |
| 0      | 9          | 13,6 | 94,0       |
| 0      | 8          | 13,6 | 75,0       |
| 0      | 13         | 9,5  | 95,0       |
| 0      | 7          | 11,8 | 28,0       |
| 1      | 6          | 10,8 | 45,0       |
| 2      | 9          | 10,8 | 21,0       |
| 0      | 10         | 10,1 |            |
| 2      | 11         | 13,3 | 18,0       |
| 0      | 13         | 7,2  | 72,0       |
| 1      | 10         | 7,3  | 43,0       |
| 1      | 13         | 12,9 | 30,0       |
| 0      | 11         | 11,9 | 63,0       |
| 0      | 12         | 13,0 | 40,0       |
| 1      | 13         | 10,7 | 29,0       |
| 1      | 17         | 12,1 | 23,0       |
| 2      | 8          | 14,3 | 50,0       |
| 3      | 16         | 9,7  | 43,0       |
| 0      | 12         | 9,0  | 65,0       |
| 2      | 9          | 12,7 | 56,0       |
| 3      | 9          | 12,9 | 65,0       |
| 1      | 14         | 12,1 | 41,0       |
| 3      | 14         | 8,5  | 29,0       |
| 1      | 7          | 14,4 | 32,0       |
| 1      | 11         | 13,1 | 25,0       |
| 0      | 4          | 13,1 | 41,0       |
| 0      | 11         | 10,4 | 41,0       |
| 0      | 6          | 12,0 | 34,0       |
| 0      | 9          | 11,8 | 22,0       |
| 0      | 12         | 11,6 | 16,0       |
| 0      | 10         | 12,5 | 46,0       |

|   |    |      |       |
|---|----|------|-------|
| 0 | 5  | 13,3 | 37,0  |
| 2 | 13 | 11,7 | 52,0  |
| 2 | 14 | 12,6 | 41,0  |
| 0 | 6  | 14,3 | 80,0  |
| 3 | 13 | 11,6 | 26,0  |
| 1 | 10 | 9,7  | 35,0  |
| 0 | 4  | 12,3 | 44,0  |
| 0 | 9  | 12,5 | 32,0  |
| 0 | 6  | 15,0 | 32,0  |
| 2 | 11 | 10,4 | 45,0  |
| 0 | 5  | 12,4 | 71,0  |
| 1 | 9  | 13,4 | 60,0  |
| 1 | 8  | 10,6 | 67,0  |
| 2 | 13 | 10,3 | 35,0  |
| 2 | 9  | 12,0 | 30,0  |
| 2 | 6  | 11,6 | 52,0  |
| 0 | 5  | 8,8  | 57,0  |
| 2 | 15 | 10,2 | 29,0  |
| 0 | 7  | 12,4 | 45,0  |
| 0 | 3  | 12,4 | 64,0  |
| 3 | 12 | 12,1 | 27,0  |
| 1 | 14 | 9,8  | 26,0  |
| 2 | 20 | 11,1 | 34,0  |
| 0 | 14 | 12,0 | 68,0  |
| 2 | 12 | 15,6 | 58,0  |
| 2 | 10 | 12,9 | 26,0  |
| 1 | 14 | 12,5 | 48,0  |
| 0 | 8  | 11,2 | 26,0  |
| 0 | 11 | 10,0 |       |
| 0 | 12 | 9,3  |       |
| 2 | 8  | 15,9 | 28,0  |
| 2 | 15 | 10,4 | 28,0  |
| 2 | 15 | 9,8  |       |
| 2 | 7  | 9,0  | 59,0  |
| 0 | 6  | 13,0 | 102,0 |
| 2 | 12 | 12,3 | 43,0  |
| 0 | 13 | 11,6 | 57,0  |
| 0 | 8  | 11,5 | 50,0  |
| 2 | 13 | 13,0 | 29,0  |
| 1 | 10 | 12,5 | 39,0  |
| 2 | 14 | 11,4 | 15,0  |
| 2 | 9  | 12,5 | 50,0  |
| 2 | 13 | 14,2 | 20,0  |
| 0 | 10 | 7,6  | 11,0  |
| 0 | 8  | 7,6  | 31,0  |
| 0 | 7  | 12,3 |       |
| 1 | 14 | 12,5 | 35,0  |
| 0 | 11 | 10,5 | 79,0  |
| 1 | 10 | 12,0 | 35,0  |
| 0 | 10 | 9,3  | 22,6  |
| 0 | 11 | 12,7 | 24,0  |
| 2 | 9  | 9,9  | 33,0  |
| 3 | 11 | 14,3 | 27,0  |
| 0 | 12 | 14,1 | 45,0  |
| 3 | 17 | 10,6 | 38,0  |
| 2 | 6  | 12,8 | 27,0  |

|   |    |      |       |
|---|----|------|-------|
| 0 | 6  | 12,0 | 45,0  |
| 2 | 12 |      | 39,0  |
| 0 | 13 | 5,9  | 45,0  |
| 1 | 8  | 14,1 | 115,0 |
| 0 | 10 | 12,3 | 23,0  |
| 2 | 9  | 10,0 | 61,0  |
| 2 | 8  | 11,9 | 51,0  |
| 0 | 16 |      |       |
| 0 | 12 | 12,1 | 79,0  |
| 0 | 13 | 10,3 | 73,0  |
| 2 | 10 | 7,7  | 33,9  |
| 0 | 12 | 10,5 | 35,0  |
| 0 | 14 | 10,8 | 67,0  |
| 1 | 16 | 8,2  | 49,0  |
| 0 | 11 | 11,0 | 24,0  |
| 0 | 11 | 12,8 | 22,0  |
| 0 | 9  | 9,6  | 30,0  |
| 2 | 7  | 12,1 | 30,0  |
| 2 | 6  | 17,3 | 35,0  |
| 2 | 8  | 12,8 | 53,0  |
| 1 | 9  | 11,8 | 43,0  |
| 2 | 6  | 11,2 | 43,0  |
| 2 | 6  | 12,8 |       |
| 2 | 13 | 12,6 | 49,0  |
| 0 | 10 | 11,4 | 46,0  |
| 2 | 9  | 9,8  |       |
| 0 | 6  | 13,2 | 25,0  |
| 0 | 13 | 9,9  | 33,0  |
| 0 | 7  | 9,9  | 42,0  |
| 0 | 7  | 12,0 |       |
| 2 | 6  | 12,0 | 68,0  |
| 1 | 3  | 10,7 | 73,0  |
| 0 | 7  | 10,6 | 43,1  |
| 2 | 10 | 14,3 | 69,0  |
| 0 | 11 | 11,6 | 37,0  |
| 0 | 12 | 17,0 |       |
| 0 | 8  | 14,2 | 75,4  |
| 2 | 2  | 12,2 | 49,7  |
| 0 | 10 | 12,6 | 61,0  |
| 0 | 5  | 11,0 | 51,0  |
| 0 | 14 | 13,2 | 103,0 |
| 0 | 6  | 12,2 |       |
| 0 | 11 | 8,8  | 17,0  |
| 1 | 17 | 9,4  | 37,0  |
| 1 | 12 | 9,4  | 39,0  |
| 2 | 17 | 13,0 | 13,0  |
| 2 | 9  | 10,9 | 68,0  |
| 0 | 11 | 12,2 | 35,0  |
| 0 | 9  | 8,9  |       |
| 0 | 12 | 14,2 | 53,0  |
| 1 | 4  | 12,7 | 53,0  |
| 2 | 14 | 10,1 | 87,0  |
| 0 | 12 | 13,2 | 18,0  |
| 2 | 8  | 12,9 | 64,4  |
| 0 | 7  | 11,4 |       |
| 1 | 9  | 10,9 | 98,0  |

|   |    |      |      |
|---|----|------|------|
| 0 | 19 | 12,7 |      |
| 0 | 7  | 8,6  |      |
| 2 | 11 | 11,9 | 20,0 |
| 0 | 9  | 10,6 |      |
| 2 | 4  | 10,8 | 36,0 |
| 0 | 7  | 11,0 |      |
| 0 | 13 | 10,8 | 25,0 |
| 0 | 3  | 10,8 | 29,0 |
| 0 | 5  | 11,5 |      |
| 0 | 6  | 11,5 | 47,0 |
| 0 | 9  | 11,9 |      |
| 0 | 11 | 10,6 | 34,0 |
| 3 | 3  | 13,1 | 43,0 |
| 2 | 2  | 13,4 | 53,0 |
| 3 | 19 | 14,2 | 31,0 |
| 3 | 12 | 13,6 | 24,0 |
| 0 | 16 | 12,6 | 42,0 |
| 0 | 10 | 11,8 | 29,0 |
| 0 | 9  | 13,3 | 48,0 |
| 2 | 9  | 12,3 |      |
| 2 | 2  | 13,4 | 47,0 |
| 0 | 8  | 13,4 | 64,0 |
| 2 | 16 | 11,2 | 8,0  |
| 2 | 4  | 11,7 | 32,0 |
| 0 | 10 | 11,5 | 36,0 |
| 1 | 12 | 14,3 | 45,0 |
| 2 | 16 | 10,3 | 28,0 |
| 1 | 12 | 11,3 | 38,0 |
| 2 | 15 | 14,7 | 34,0 |
| 2 | 13 | 14,0 |      |
| 2 | 8  | 10,4 | 39,0 |
| 0 | 8  | 11,9 | 42,0 |
| 2 | 10 | 9,4  | 25,0 |
| 0 | 8  | 13,7 | 64,0 |
| 0 | 10 | 11,8 |      |
| 2 | 9  | 13,9 | 34,0 |
| 2 | 8  | 11,0 | 65,0 |
| 0 | 4  | 12,1 | 33,0 |
| 0 | 9  | 13,8 | 36,0 |
| 0 | 10 | 11,1 |      |
| 0 | 11 | 12,1 |      |
| 3 | 3  | 11,4 | 49,8 |
| 2 | 7  | 13,1 | 50,3 |
| 0 | 8  | 9,9  | 22,0 |
| 2 | 13 | 11,5 | 47,0 |
| 2 | 14 | 13,3 | 67,0 |
| 0 | 9  | 12,5 | 32,0 |
| 0 | 6  | 12,6 | 40,0 |
| 2 | 12 | 12,2 | 40,0 |
| 0 | 8  | 13,4 | 35,0 |
| 0 | 9  | 9,1  | 44,0 |
| 0 | 9  | 11,7 | 38,0 |
| 0 | 14 | 10,9 | 32,0 |
| 3 | 16 | 12,1 | 45,0 |
| 0 | 13 | 11,8 | 28,2 |
| 0 | 16 | 12,0 | 17,0 |

|   |    |      |       |
|---|----|------|-------|
| 1 | 15 | 12,0 | 47,0  |
| 0 | 7  | 13,4 | 36,0  |
| 2 | 11 | 12,7 | 40,0  |
| 0 | 16 | 11,6 | 7,0   |
| 0 | 8  | 13,6 | 35,0  |
| 2 | 8  | 10,6 | 37,0  |
| 1 | 11 | 13,2 | 86,0  |
| 1 | 10 | 14,8 | 54,0  |
| 0 | 19 | 11,1 | 34,0  |
| 0 | 13 | 6,9  | 27,0  |
| 0 | 12 | 9,7  | 40,0  |
| 3 | 17 | 14,6 | 77,0  |
| 0 | 10 | 10,9 | 34,5  |
| 3 | 12 | 12,7 | 23,0  |
| 0 | 13 | 13,5 | 67,0  |
| 0 | 14 | 14,3 | 101,0 |
| 2 | 23 | 12,4 | 66,0  |
| 1 | 11 | 16,6 | 30,0  |
| 0 | 9  | 13,4 | 54,0  |
| 3 | 18 | 17,2 | 65,0  |
| 0 | 13 | 8,2  | 70,1  |
| 1 | 14 | 13,2 | 87,0  |
| 0 | 6  | 12,7 | 102,8 |
| 2 | 13 | 12,7 | 45,0  |
| 2 | 12 | 11,8 | 15,0  |
| 1 | 15 | 8,7  | 14,0  |
| 2 | 16 | 9,1  | 57,0  |
| 0 | 14 | 11,4 | 40,0  |
| 2 | 9  | 11,4 | 25,9  |
| 0 | 10 | 13,2 | 27,0  |
| 0 | 14 | 11,0 | 16,0  |
| 0 | 7  | 10,2 | 35,0  |
| 2 | 16 | 15,2 | 42,0  |
| 0 | 15 | 14,1 | 43,9  |
| 2 | 18 | 11,9 | 34,0  |
| 0 | 11 | 14,9 | 34,4  |
| 0 | 10 | 14,3 | 70,0  |
| 2 | 9  | 13,2 | 57,0  |
| 0 | 5  | 10,2 | 69,0  |
| 2 | 10 | 9,3  | 29,9  |
| 1 | 13 | 11,2 | 24,0  |
| 0 | 8  | 12,8 | 33,0  |
| 2 | 16 | 10,3 | 32,0  |
| 2 | 9  | 12,4 | 73,0  |
| 3 | 16 | 10,5 | 44,0  |
| 0 | 5  | 9,7  | 38,0  |
| 0 | 13 | 10,3 | 30,0  |
| 0 | 14 | 10,9 | 114,0 |
| 2 | 14 | 10,4 | 98,0  |
| 1 | 5  | 13,3 | 53,1  |
| 0 | 13 | 12,6 | 41,1  |
| 0 | 6  | 13,6 | 78,6  |
| 2 | 19 | 11,2 | 59,2  |
| 0 | 10 | 9,9  | 36,2  |
| 2 | 11 | 15,4 | 58,4  |
| 0 | 7  | 10,6 | 36,0  |

|   |    |      |      |
|---|----|------|------|
| 0 | 8  | 11,8 | 47,2 |
| 0 | 11 | 13,7 | 65,0 |
| 2 | 11 | 11,2 | 58,8 |









\_\_\_\_\_
